# Supplementary material for: Xist RNA binds select autosomal genes and depends on Repeat B to regulate their expression
Source: eLife. 2025 Jun 9;13:RP101197. doi: 10.7554/eLife.101197 (PMC12148325; doi:10.7554/eLife.101197)
Supplement: Supplementary file 1. [file elife-101197-supp1.xlsx]

## Sheet: Sheet1
chr start end
chr1 9748110 9748368
chr1 16518586 16518910
chr1 16519112 16519421
chr1 24100027 24100258
chr1 24612536 24613334
chr1 30804177 30804722
chr1 30804177 30804722
chr1 39936249 39936659
chr1 153899949 153901083
chr1 153899949 153901083
chr1 156558755 156558938
chr1 182124671 182124854
chr10 39169977 39170516
chr10 79908071 79908583
chr10 79924631 79925137
chr10 130594803 130595025
chr11 3177485 3178405
chr11 98741724 98742010
chr11 115813536 115813726
chr11 119163075 119163285
chr12 3109901 3110091
chr12 19175831 19176298
chr12 72917316 72917815
chr12 112976533 112976771
chr12 120028691 120028920
chr13 48545366 48545803
chr13 51100795 51101077
chr13 55444744 55444981
chr13 64129303 64129591
chr14 118812339 118813204
chr14 124801596 124802234
chr15 79177844 79178050
chr15 88862786 88863194
chr16 31594837 31595020
chr16 35022341 35023510
chr16 35022341 35023510
chr16 35023958 35024239
chr16 35025080 35025675
chr16 98107469 98107677
chr17 24206796 24207128
chr17 31843341 31843643
chr17 33951132 33951534
chr17 67500009 67500275
chr18 37685199 37685423
chr19 4810381 4811088
chr19 5842855 5843132
chr19 45749217 45749562
chr19 46580000 46580240
chr2 31345774 31346062
chr2 69898206 69898538
chr2 84670518 84670715
chr2 98662231 98662870
chr2 98665023 98665273
chr2 98666255 98667333
chr2 125624484 125625118
chr2 130170839 130171022
chr2 181365504 181365698
chr2 182012769 182013197
chr3 88336633 88336846
chr3 107332758 107333116
chr3 159939397 159939620
chr4 12037098 12037390
chr4 84708480 84708733
chr4 148444522 148444726
chr5 23433360 23433786
chr5 25499444 25499767
chr5 33608567 33608792
chr5 113960519 113960841
chr5 123629053 123629267
chr5 135168534 135169214
chr5 138978018 138978493
chr6 4600793 4601174
chr6 13287703 13287887
chr6 28261460 28262325
chr6 39538392 39538685
chr6 41335916 41336099
chr6 86524668 86525129
chr6 103649099 103649359
chr6 115774599 115775052
chr6 122719952 122720339
chr7 5038094 5038416
chr7 19920912 19921095
chr7 34220890 34221088
chr7 47132455 47132788
chr7 66079584 66079871
chr7 79715590 79715852
chr7 127851237 127851659
chr8 12400911 12401129
chr8 25597273 25597461
chr8 43181362 43181759
chr8 47673864 47674129
chr8 70211894 70212143
chr8 70698887 70699143
chr8 71724308 71725691
chr8 71724308 71725691
chr8 79029186 79030269
chr8 83715295 83716703
chr8 86884945 86885310
chr8 88126726 88127157
chr8 105289462 105289765
chr8 116614289 116614476
chr8 123040629 123041272
chr9 3000379 3000637
chr9 3024049 3024235
chr9 3024384 3024592
chr9 20830263 20830549
chr9 35305295 35305586
chr9 40192284 40192990
chr9 40802009 40802701
chr9 53667154 53667388
chr9 56417954 56418282
chr9 65641687 65641910
