# Supplementary material for: Xist RNA binds select autosomal genes and depends on Repeat B to regulate their expression
Source: eLife. 2025 Jun 9;13:RP101197. doi: 10.7554/eLife.101197 (PMC12148325; doi:10.7554/eLife.101197)
Supplement: Supplementary file 2. [file elife-101197-supp2.xlsx]

## Sheet: Sheet1
chr start end
chr1 16519044 16519411
chr1 24099693 24100222
chr1 24612617 24613282
chr1 87181587 87181759
chr1 93668003 93668175
chr1 153900073 153900812
chr1 178318514 178318768
chr1 182124779 182125094
chr1 186649071 186649279
chr10 81167921 81168187
chr10 130594811 130594993
chr11 3178025 3178370
chr11 32161958 32162258
chr11 36529766 36529938
chr11 54438199 54438417
chr11 80080595 80080892
chr11 96788564 96788817
chr11 97985984 97986173
chr12 39993633 39993805
chr12 72917488 72917752
chr12 112976520 112976799
chr12 120028686 120028917
chr13 48545032 48545344
chr13 48545483 48545824
chr13 51100775 51101326
chr13 51101516 51101887
chr13 55513072 55513403
chr13 90089581 90089904
chr13 97241177 97241380
chr14 8097677 8097849
chr14 24208693 24208882
chr14 25541942 25542114
chr14 124801625 124801975
chr15 75086676 75086878
chr15 98779534 98779807
chr15 99735685 99736008
chr16 35022321 35022773
chr16 35900203 35900375
chr16 98107484 98107673
chr17 24169488 24169660
chr17 25813259 25813481
chr17 33951172 33951560
chr18 36744261 36744442
chr19 4810613 4811068
chr19 5842624 5842912
chr19 7422229 7422408
chr19 55219418 55219594
chr2 84670384 84670701
chr2 98662228 98662944
chr2 98665019 98665249
chr2 98666528 98667345
chr2 125624832 125625167
chr2 133543680 133543885
chr2 181365407 181365672
chr2 181365908 181366080
chr2 182012753 182013120
chr3 16182657 16183070
chr3 90052153 90052530
chr3 107332817 107333086
chr3 122293107 122293470
chr4 40970646 40970824
chr4 126202095 126202633
chr4 127236504 127236760
chr4 148444606 148444778
chr5 5287744 5287925
chr5 128450993 128451168
chr5 135168452 135169171
chr5 135169481 135169697
chr6 4600891 4601144
chr6 38298787 38299009
chr6 83442042 83442359
chr6 84061624 84061805
chr6 85451450 85451643
chr6 85512460 85512738
chr6 88590733 88590907
chr6 103649110 103649337
chr6 114553146 114553350
chr6 114553867 114554061
chr6 114625224 114625440
chr6 115774602 115774785
chr6 122719940 122720116
chr6 135065412 135065627
chr7 5038229 5038442
chr7 30321744 30322157
chr7 66079576 66079771
chr7 75380065 75380377
chr8 19787446 19787618
chr8 47244013 47244222
chr8 62504258 62504456
chr8 70698849 70699206
chr8 71724984 71725728
chr8 79030122 79030329
chr8 83715307 83716370
chr8 83715307 83716370
chr8 86885053 86885293
chr8 128685402 128685623
chr9 3000404 3000645
chr9 3024378 3024599
chr9 35305319 35305585
chr9 40192643 40193106
chr9 40801490 40802675
chr9 44605364 44605554
chr9 44881765 44881978
chr9 53667112 53667517
chr9 65641631 65642037
chr9 72673367 72673649
