# Supplementary material for: Xist RNA binds select autosomal genes and depends on Repeat B to regulate their expression
Source: eLife. 2025 Jun 9;13:RP101197. doi: 10.7554/eLife.101197 (PMC12148325; doi:10.7554/eLife.101197)
Supplement: Supplementary file 3. [file elife-101197-supp3.xlsx]

## Sheet: Sheet1
chr start end
chr1 9748200 9748367
chr1 24100031 24100361
chr1 24612619 24613279
chr10 34282212 34282669
chr11 54438153 54438390
chr12 26199441 26199650
chr12 55492054 55492401
chr12 120028708 120028896
chr13 48545401 48545792
chr13 51100831 51101177
chr13 55513092 55513469
chr15 75086750 75086929
chr16 35022338 35022780
chr16 48993919 48994104
chr17 24169500 24169667
chr17 33951073 33951675
chr17 80727959 80728126
chr18 24876383 24876572
chr19 4810613 4810923
chr19 45749355 45749594
chr2 51148818 51148991
chr2 98662558 98662771
chr2 98665041 98665208
chr2 98666566 98667312
chr2 125624904 125625104
chr2 181365425 181365619
chr2 182012797 182012969
chr3 27710297 27710507
chr3 107332769 107333051
chr3 123063283 123063499
chr4 40722832 40723056
chr4 115839366 115839533
chr4 148444592 148444759
chr5 25499438 25499708
chr5 121948585 121948787
chr5 136045633 136046096
chr6 28262083 28262255
chr6 38224645 38224846
chr6 103649122 103649294
chr6 115775362 115775569
chr7 5038232 5038409
chr7 116443570 116443814
chr7 127375692 127375979
chr8 70698849 70699095
chr9 35305368 35305554
