# Supplementary material for: Xist RNA binds select autosomal genes and depends on Repeat B to regulate their expression
Source: eLife. 2025 Jun 9;13:RP101197. doi: 10.7554/eLife.101197 (PMC12148325; doi:10.7554/eLife.101197)
Supplement: Supplementary file 4. [file elife-101197-supp4.xlsx]

## Sheet: Sheet1
initial_alias	converted_alias	name	description	namespace
ENSMUSG00000074886	Grk6	Grk6	G protein-coupled receptor kinase 6 [Source:MGI Symbol;Acc:MGI:1347078]	ARRAYEXPRESS,ENSG
ENSMUSG00000001415	Smg5	Smg5	SMG5 nonsense mediated mRNA decay factor [Source:MGI Symbol;Acc:MGI:2447364]	ARRAYEXPRESS,ENSG
ENSMUSG00000001418	Glmp	Glmp	glycosylated lysosomal membrane protein [Source:MGI Symbol;Acc:MGI:1913318]	ARRAYEXPRESS,ENSG
ENSMUSG00000001420	Tmem79	Tmem79	transmembrane protein 79 [Source:MGI Symbol;Acc:MGI:1919163]	ARRAYEXPRESS,ENSG
ENSMUSG00000002803	Btbd6	Btbd6	BTB (POZ) domain containing 6 [Source:MGI Symbol;Acc:MGI:3026623]	ARRAYEXPRESS,ENSG
ENSMUSG00000002885	Adgre5	Adgre5	adhesion G protein-coupled receptor E5 [Source:MGI Symbol;Acc:MGI:1347095]	ARRAYEXPRESS,ENSG
ENSMUSG00000005374	Tbl2	Tbl2	transducin (beta)-like 2 [Source:MGI Symbol;Acc:MGI:1351652]	ARRAYEXPRESS,ENSG
ENSMUSG00000006456	Rbm14	Rbm14	RNA binding motif protein 14 [Source:MGI Symbol;Acc:MGI:1929092]	ARRAYEXPRESS,ENSG
ENSMUSG00000008668	Rps18	Rps18	ribosomal protein S18 [Source:MGI Symbol;Acc:MGI:98146]	ARRAYEXPRESS,ENSG
ENSMUSG00000011158	Brf1	Brf1	BRF1, RNA polymerase III transcription initiation factor 90 kDa subunit [Source:MGI Symbol;Acc:MGI:1919558]	ARRAYEXPRESS,ENSG
ENSMUSG00000012396	Nanog	Nanog	Nanog homeobox [Source:MGI Symbol;Acc:MGI:1919200]	ARRAYEXPRESS,ENSG
ENSMUSG00000015189	Casd1	Casd1	CAS1 domain containing 1 [Source:MGI Symbol;Acc:MGI:2384865]	ARRAYEXPRESS,ENSG
ENSMUSG00000015656	Hspa8	Hspa8	heat shock protein 8 [Source:MGI Symbol;Acc:MGI:105384]	ARRAYEXPRESS,ENSG
ENSMUSG00000005481	Ddx39a	Ddx39a	DEAD box helicase 39a [Source:MGI Symbol;Acc:MGI:1915528]	ARRAYEXPRESS,ENSG
ENSMUSG00000002343	Armc6	Armc6	armadillo repeat containing 6 [Source:MGI Symbol;Acc:MGI:1924063]	ARRAYEXPRESS,ENSG
ENSMUSG00000019564	Arid3a	Arid3a	AT rich interactive domain 3A (BRIGHT-like) [Source:MGI Symbol;Acc:MGI:1328360]	ARRAYEXPRESS,ENSG
ENSMUSG00000020781	Tsen54	Tsen54	tRNA splicing endonuclease subunit 54 [Source:MGI Symbol;Acc:MGI:1923515]	ARRAYEXPRESS,ENSG
ENSMUSG00000024042	Sik1	Sik1	salt inducible kinase 1 [Source:MGI Symbol;Acc:MGI:104754]	ARRAYEXPRESS,ENSG
ENSMUSG00000024312	Wdr46	Wdr46	WD repeat domain 46 [Source:MGI Symbol;Acc:MGI:1931871]	ARRAYEXPRESS,ENSG
ENSMUSG00000024319	Vps52	Vps52	VPS52 GARP complex subunit [Source:MGI Symbol;Acc:MGI:1330304]	ARRAYEXPRESS,ENSG
ENSMUSG00000024816	Frmd8	Frmd8	FERM domain containing 8 [Source:MGI Symbol;Acc:MGI:1914707]	ARRAYEXPRESS,ENSG
ENSMUSG00000025035	Arl3	Arl3	ADP-ribosylation factor-like 3 [Source:MGI Symbol;Acc:MGI:1929699]	ARRAYEXPRESS,ENSG
ENSMUSG00000025036	Sfxn2	Sfxn2	sideroflexin 2 [Source:MGI Symbol;Acc:MGI:2137678]	ARRAYEXPRESS,ENSG
ENSMUSG00000025219	Fgf8	Fgf8	fibroblast growth factor 8 [Source:MGI Symbol;Acc:MGI:99604]	ARRAYEXPRESS,ENSG
ENSMUSG00000025220	Oga	Oga	O-GlcNAcase [Source:MGI Symbol;Acc:MGI:1932139]	ARRAYEXPRESS,ENSG
ENSMUSG00000025602	Zfp202	Zfp202	zinc finger protein 202 [Source:MGI Symbol;Acc:MGI:1933401]	ARRAYEXPRESS,ENSG
ENSMUSG00000025920	Stau2	Stau2	staufen double-stranded RNA binding protein 2 [Source:MGI Symbol;Acc:MGI:1352508]	ARRAYEXPRESS,ENSG
ENSMUSG00000026153	Fam135a	Fam135a	family with sequence similarity 135, member A [Source:MGI Symbol;Acc:MGI:1915437]	ARRAYEXPRESS,ENSG
ENSMUSG00000026511	Srp9	Srp9	signal recognition particle 9 [Source:MGI Symbol;Acc:MGI:1350930]	ARRAYEXPRESS,ENSG
ENSMUSG00000026596	Abl2	Abl2	v-abl Abelson murine leukemia viral oncogene 2 (arg, Abelson-related gene) [Source:MGI Symbol;Acc:MGI:87860]	ARRAYEXPRESS,ENSG
ENSMUSG00000027582	Zgpat	Zgpat	zinc finger, CCCH-type with G patch domain [Source:MGI Symbol;Acc:MGI:2449939]	ARRAYEXPRESS,ENSG
ENSMUSG00000049550	Clip1	Clip1	CAP-GLY domain containing linker protein 1 [Source:MGI Symbol;Acc:MGI:1928401]	ARRAYEXPRESS,ENSG
ENSMUSG00000029681	Bcl7b	Bcl7b	B cell CLL/lymphoma 7B [Source:MGI Symbol;Acc:MGI:1332238]	ARRAYEXPRESS,ENSG
ENSMUSG00000003153	Slc2a3	Slc2a3	solute carrier family 2 (facilitated glucose transporter), member 3 [Source:MGI Symbol;Acc:MGI:95757]	ARRAYEXPRESS,ENSG
ENSMUSG00000030512	Snrpa1	Snrpa1	small nuclear ribonucleoprotein polypeptide A' [Source:MGI Symbol;Acc:MGI:1916231]	ARRAYEXPRESS,ENSG
ENSMUSG00000030546	Plin1	Plin1	perilipin 1 [Source:MGI Symbol;Acc:MGI:1890505]	ARRAYEXPRESS,ENSG
ENSMUSG00000030805	Stx4a	Stx4a	syntaxin 4A (placental) [Source:MGI Symbol;Acc:MGI:893577]	ARRAYEXPRESS,ENSG
ENSMUSG00000030854	Ptpn5	Ptpn5	protein tyrosine phosphatase, non-receptor type 5 [Source:MGI Symbol;Acc:MGI:97807]	ARRAYEXPRESS,ENSG
ENSMUSG00000031652	N4bp1	N4bp1	NEDD4 binding protein 1 [Source:MGI Symbol;Acc:MGI:2136825]	ARRAYEXPRESS,ENSG
ENSMUSG00000032030	Cul5	Cul5	cullin 5 [Source:MGI Symbol;Acc:MGI:1922967]	ARRAYEXPRESS,ENSG
ENSMUSG00000032329	Hmg20a	Hmg20a	high mobility group 20A [Source:MGI Symbol;Acc:MGI:1914117]	ARRAYEXPRESS,ENSG
ENSMUSG00000039841	Zfp800	Zfp800	zinc finger protein 800 [Source:MGI Symbol;Acc:MGI:1889334]	ARRAYEXPRESS,ENSG
ENSMUSG00000039133	None	None	None
ENSMUSG00000038456	Dennd2a	Dennd2a	DENN domain containing 2A [Source:MGI Symbol;Acc:MGI:2444961]	ARRAYEXPRESS,ENSG
ENSMUSG00000036427	Gpi1	Gpi1	glucose-6-phosphate isomerase 1 [Source:MGI Symbol;Acc:MGI:95797]	ARRAYEXPRESS,ENSG
ENSMUSG00000034471	Caskin2	Caskin2	CASK-interacting protein 2 [Source:MGI Symbol;Acc:MGI:2157062]	ARRAYEXPRESS,ENSG
ENSMUSG00000035109	Shc4	Shc4	SHC (Src homology 2 domain containing) family, member 4 [Source:MGI Symbol;Acc:MGI:2655364]	ARRAYEXPRESS,ENSG
ENSMUSG00000035828	Pim3	Pim3	proviral integration site 3 [Source:MGI Symbol;Acc:MGI:1355297]	ARRAYEXPRESS,ENSG
ENSMUSG00000021098	4930447C04Rik	4930447C04Rik	RIKEN cDNA 4930447C04 gene [Source:MGI Symbol;Acc:MGI:1923051]	ARRAYEXPRESS,ENSG
ENSMUSG00000038056	Kmt2c	Kmt2c	lysine (K)-specific methyltransferase 2C [Source:MGI Symbol;Acc:MGI:2444959]	ARRAYEXPRESS,ENSG
ENSMUSG00000035773	Kiss1r	Kiss1r	KISS1 receptor [Source:MGI Symbol;Acc:MGI:2148793]	ARRAYEXPRESS,ENSG
ENSMUSG00000035781	R3hdm4	R3hdm4	R3H domain containing 4 [Source:MGI Symbol;Acc:MGI:1924814]	ARRAYEXPRESS,ENSG
ENSMUSG00000025856	Pdgfa	Pdgfa	platelet derived growth factor, alpha [Source:MGI Symbol;Acc:MGI:97527]	ARRAYEXPRESS,ENSG
ENSMUSG00000022132	Cldn10	Cldn10	claudin 10 [Source:MGI Symbol;Acc:MGI:1913101]	ARRAYEXPRESS,ENSG
ENSMUSG00000038671	Arfrp1	Arfrp1	ADP-ribosylation factor related protein 1 [Source:MGI Symbol;Acc:MGI:1923938]	ARRAYEXPRESS,ENSG
ENSMUSG00000038685	Rtel1	Rtel1	regulator of telomere elongation helicase 1 [Source:MGI Symbol;Acc:MGI:2139369]	ARRAYEXPRESS,ENSG
ENSMUSG00000047053	Teddm1a	Teddm1a	transmembrane epididymal protein 1A [Source:MGI Symbol;Acc:MGI:2668439]	ARRAYEXPRESS,ENSG
ENSMUSG00000047719	Ubiad1	Ubiad1	UbiA prenyltransferase domain containing 1 [Source:MGI Symbol;Acc:MGI:1918957]	ARRAYEXPRESS,ENSG
ENSMUSG00000051695	Pcbp1	Pcbp1	poly(rC) binding protein 1 [Source:MGI Symbol;Acc:MGI:1345635]	ARRAYEXPRESS,ENSG
ENSMUSG00000050043	Tmx2	Tmx2	thioredoxin-related transmembrane protein 2 [Source:MGI Symbol;Acc:MGI:1914208]	ARRAYEXPRESS,ENSG
ENSMUSG00000044308	Ubr3	Ubr3	ubiquitin protein ligase E3 component n-recognin 3 [Source:MGI Symbol;Acc:MGI:1861100]	ARRAYEXPRESS,ENSG
ENSMUSG00000028991	Mtor	Mtor	mechanistic target of rapamycin kinase [Source:MGI Symbol;Acc:MGI:1928394]	ARRAYEXPRESS,ENSG
ENSMUSG00000048004	Tmem196	Tmem196	transmembrane protein 196 [Source:MGI Symbol;Acc:MGI:2685374]	ARRAYEXPRESS,ENSG
ENSMUSG00000044934	Zfp367	Zfp367	zinc finger protein 367 [Source:MGI Symbol;Acc:MGI:2442266]	ARRAYEXPRESS,ENSG
ENSMUSG00000050382	Kif7	Kif7	kinesin family member 7 [Source:MGI Symbol;Acc:MGI:1098239]	ARRAYEXPRESS,ENSG
ENSMUSG00000035376	Hacd2	Hacd2	3-hydroxyacyl-CoA dehydratase 2 [Source:MGI Symbol;Acc:MGI:1918007]	ARRAYEXPRESS,ENSG
ENSMUSG00000074305	Peak1	Peak1	pseudopodium-enriched atypical kinase 1 [Source:MGI Symbol;Acc:MGI:2442366]	ARRAYEXPRESS,ENSG
ENSMUSG00000048109	Rbm15	Rbm15	RNA binding motif protein 15 [Source:MGI Symbol;Acc:MGI:2443205]	ARRAYEXPRESS,ENSG
ENSMUSG00000051095	Or6x1	Or6x1	olfactory receptor family 6 subfamily X member 1 [Source:MGI Symbol;Acc:MGI:3030820]	ARRAYEXPRESS,ENSG
ENSMUSG00000043290	Zfp784	Zfp784	zinc finger protein 784 [Source:MGI Symbol;Acc:MGI:3606042]	ARRAYEXPRESS,ENSG
ENSMUSG00000002346	Slc25a42	Slc25a42	solute carrier family 25, member 42 [Source:MGI Symbol;Acc:MGI:1920345]	ARRAYEXPRESS,ENSG
ENSMUSG00000058756	Thra	Thra	thyroid hormone receptor alpha [Source:MGI Symbol;Acc:MGI:98742]	ARRAYEXPRESS,ENSG
ENSMUSG00000053773	Rdh8	Rdh8	retinol dehydrogenase 8 [Source:MGI Symbol;Acc:MGI:2685028]	ARRAYEXPRESS,ENSG
ENSMUSG00000023764	Sfi1	Sfi1	Sfi1 homolog, spindle assembly associated (yeast) [Source:MGI Symbol;Acc:MGI:1926137]	ARRAYEXPRESS,ENSG
ENSMUSG00000030077	Chl1	Chl1	cell adhesion molecule L1-like [Source:MGI Symbol;Acc:MGI:1098266]	ARRAYEXPRESS,ENSG
ENSMUSG00000028173	Wls	Wls	wntless WNT ligand secretion mediator [Source:MGI Symbol;Acc:MGI:1915401]	ARRAYEXPRESS,ENSG
ENSMUSG00000056209	Npm3	Npm3	nucleoplasmin 3 [Source:MGI Symbol;Acc:MGI:894653]	ARRAYEXPRESS,ENSG
ENSMUSG00000098505	Gm14496	Gm14496	predicted gene 14496 [Source:MGI Symbol;Acc:MGI:3769929]	ARRAYEXPRESS,ENSG
ENSMUSG00000104346	Pcdhga3	Pcdhga3	protocadherin gamma subfamily A, 3 [Source:MGI Symbol;Acc:MGI:1935215]	ARRAYEXPRESS,ENSG
ENSMUSG00000030319	Cand2	Cand2	cullin-associated and neddylation-dissociated 2 (putative) [Source:MGI Symbol;Acc:MGI:1914338]	ARRAYEXPRESS,ENSG
ENSMUSG00000074405	Zfp865	Zfp865	zinc finger protein 865 [Source:MGI Symbol;Acc:MGI:2442656]	ARRAYEXPRESS,ENSG
ENSMUSG00000062074	Ccn6	Ccn6	cellular communication network factor 6 [Source:MGI Symbol;Acc:MGI:2685581]	ARRAYEXPRESS,ENSG
ENSMUSG00000042121	Ssh1	Ssh1	slingshot protein phosphatase 1 [Source:MGI Symbol;Acc:MGI:2686240]	ARRAYEXPRESS,ENSG
ENSMUSG00000037363	Letm2	Letm2	leucine zipper-EF-hand containing transmembrane protein 2 [Source:MGI Symbol;Acc:MGI:2444979]	ARRAYEXPRESS,ENSG
ENSMUSG00000063049	Ing2	Ing2	inhibitor of growth family, member 2 [Source:MGI Symbol;Acc:MGI:1916510]	ARRAYEXPRESS,ENSG
ENSMUSG00000047935	None	None	None
ENSMUSG00000064648	None	None	None
ENSMUSG00000119805	None	None	None
ENSMUSG00000065421	Mirlet7a-1	Mirlet7a-1	microRNA let7a-1 [Source:MGI Symbol;Acc:MGI:2676793]	ARRAYEXPRESS,ENSG
ENSMUSG00000065453	Mirlet7d	Mirlet7d	microRNA let7d [Source:MGI Symbol;Acc:MGI:2676796]	ARRAYEXPRESS,ENSG
ENSMUSG00000026473	Glul	Glul	glutamate-ammonia ligase (glutamine synthetase) [Source:MGI Symbol;Acc:MGI:95739]	ARRAYEXPRESS,ENSG
ENSMUSG00000067370	B3galt4	B3galt4	UDP-Gal:betaGlcNAc beta 1,3-galactosyltransferase, polypeptide 4 [Source:MGI Symbol;Acc:MGI:1859517]	ARRAYEXPRESS,ENSG
ENSMUSG00000071064	Zfp827	Zfp827	zinc finger protein 827 [Source:MGI Symbol;Acc:MGI:2444807]	ARRAYEXPRESS,ENSG
ENSMUSG00000048874	Phf3	Phf3	PHD finger protein 3 [Source:MGI Symbol;Acc:MGI:2446126]	ARRAYEXPRESS,ENSG
ENSMUSG00000067736	None	None	None
ENSMUSG00000068394	Cep152	Cep152	centrosomal protein 152 [Source:MGI Symbol;Acc:MGI:2139083]	ARRAYEXPRESS,ENSG
ENSMUSG00000070000	Fcho1	Fcho1	FCH domain only 1 [Source:MGI Symbol;Acc:MGI:1921265]	ARRAYEXPRESS,ENSG
ENSMUSG00000029004	Kmt2e	Kmt2e	lysine (K)-specific methyltransferase 2E [Source:MGI Symbol;Acc:MGI:1924825]	ARRAYEXPRESS,ENSG
ENSMUSG00000036810	Cnep1r1	Cnep1r1	CTD nuclear envelope phosphatase 1 regulatory subunit 1 [Source:MGI Symbol;Acc:MGI:1921981]	ARRAYEXPRESS,ENSG
ENSMUSG00000071076	Jund	Jund	jun D proto-oncogene [Source:MGI Symbol;Acc:MGI:96648]	ARRAYEXPRESS,ENSG
ENSMUSG00000021395	Spin1	Spin1	spindlin 1 [Source:MGI Symbol;Acc:MGI:109242]	ARRAYEXPRESS,ENSG
ENSMUSG00000035569	Ankrd11	Ankrd11	ankyrin repeat domain 11 [Source:MGI Symbol;Acc:MGI:1924337]	ARRAYEXPRESS,ENSG
ENSMUSG00000074357	None	None	None
ENSMUSG00000033114	Slc35d2	Slc35d2	solute carrier family 35, member D2 [Source:MGI Symbol;Acc:MGI:1917734]	ARRAYEXPRESS,ENSG
ENSMUSG00000073147	5031425E22Rik	5031425E22Rik	RIKEN cDNA 5031425E22 gene [Source:MGI Symbol;Acc:MGI:1923227]	ARRAYEXPRESS,ENSG
ENSMUSG00000075701	Selenos	Selenos	selenoprotein S [Source:MGI Symbol;Acc:MGI:95994]	ARRAYEXPRESS,ENSG
ENSMUSG00000118706	None	None	None
ENSMUSG00000027080	Med19	Med19	mediator complex subunit 19 [Source:MGI Symbol;Acc:MGI:1914234]	ARRAYEXPRESS,ENSG
ENSMUSG00000076437	Selenoh	Selenoh	selenoprotein H [Source:MGI Symbol;Acc:MGI:1919907]	ARRAYEXPRESS,ENSG
ENSMUSG00000027404	Snrpb	Snrpb	small nuclear ribonucleoprotein B [Source:MGI Symbol;Acc:MGI:98342]	ARRAYEXPRESS,ENSG
ENSMUSG00000013833	Med16	Med16	mediator complex subunit 16 [Source:MGI Symbol;Acc:MGI:2158394]	ARRAYEXPRESS,ENSG
ENSMUSG00000103458	Gm37013	Gm37013	predicted gene, 37013 [Source:MGI Symbol;Acc:MGI:5610241]	ARRAYEXPRESS,ENSG
ENSMUSG00000080058	None	None	None
ENSMUSG00000084552	None	None	None
ENSMUSG00000084601	Gm23111	Gm23111	predicted gene, 23111 [Source:MGI Symbol;Acc:MGI:5452888]	ARRAYEXPRESS,ENSG
ENSMUSG00000045968	Teddm2	Teddm2	transmembrane epididymal family member 2 [Source:MGI Symbol;Acc:MGI:1923273]	ARRAYEXPRESS,ENSG
ENSMUSG00000086604	Gm15510	Gm15510	predicted gene 15510 [Source:MGI Symbol;Acc:MGI:3782958]	ARRAYEXPRESS,ENSG
ENSMUSG00000085058	8030453O22Rik	8030453O22Rik	RIKEN cDNA 8030453O22 gene [Source:MGI Symbol;Acc:MGI:1924459]	ARRAYEXPRESS,ENSG
ENSMUSG00000075555	None	None	None
ENSMUSG00000086598	Btbd18	Btbd18	BTB (POZ) domain containing 18 [Source:MGI Symbol;Acc:MGI:3650217]	ARRAYEXPRESS,ENSG
ENSMUSG00000087367	None	None	None
ENSMUSG00000043488	None	None	None
ENSMUSG00000054823	Nsd3	Nsd3	nuclear receptor binding SET domain protein 3 [Source:MGI Symbol;Acc:MGI:2142581]	ARRAYEXPRESS,ENSG
ENSMUSG00000086526	None	None	None
ENSMUSG00000043340	None	None	None
ENSMUSG00000086914	Gm16124	Gm16124	predicted gene 16124 [Source:MGI Symbol;Acc:MGI:3802001]	ARRAYEXPRESS,ENSG
ENSMUSG00000020457	Drg1	Drg1	developmentally regulated GTP binding protein 1 [Source:MGI Symbol;Acc:MGI:1343297]	ARRAYEXPRESS,ENSG
ENSMUSG00000026074	Map4k4	Map4k4	mitogen-activated protein kinase kinase kinase kinase 4 [Source:MGI Symbol;Acc:MGI:1349394]	ARRAYEXPRESS,ENSG
ENSMUSG00000091490	Triml2	Triml2	tripartite motif family-like 2 [Source:MGI Symbol;Acc:MGI:3642989]	ARRAYEXPRESS,ENSG
ENSMUSG00000096755	None	None	None
ENSMUSG00000096370	Gm21992	Gm21992	predicted gene 21992 [Source:MGI Symbol;Acc:MGI:5439461]	ARRAYEXPRESS,ENSG
ENSMUSG00000092274	Neat1	Neat1	nuclear paraspeckle assembly transcript 1 (non-protein coding) [Source:MGI Symbol;Acc:MGI:1914211]	ARRAYEXPRESS,ENSG
ENSMUSG00000095913	None	None	None
ENSMUSG00000096014	Sox1	Sox1	SRY (sex determining region Y)-box 1 [Source:MGI Symbol;Acc:MGI:98357]	ARRAYEXPRESS,ENSG
ENSMUSG00000097048	None	None	None
ENSMUSG00000097375	None	None	None
ENSMUSG00000097513	None	None	None
ENSMUSG00000099227	Mir8114	Mir8114	microRNA 8114 [Source:MGI Symbol;Acc:MGI:5530764]	ARRAYEXPRESS,ENSG
ENSMUSG00000099163	Mir7660	Mir7660	microRNA 7660 [Source:MGI Symbol;Acc:MGI:5531094]	ARRAYEXPRESS,ENSG
ENSMUSG00000098465	Mir1668	Mir1668	microRNA 1668 [Source:MGI Symbol;Acc:MGI:5530972]	ARRAYEXPRESS,ENSG
ENSMUSG00000098434	None	None	None
ENSMUSG00000099058	Mir6943	Mir6943	microRNA 6943 [Source:MGI Symbol;Acc:MGI:5531173]	ARRAYEXPRESS,ENSG
ENSMUSG00000101180	None	None	None
ENSMUSG00000099881	2810013P06Rik	2810013P06Rik	RIKEN cDNA 2810013P06 gene [Source:MGI Symbol;Acc:MGI:1914456]	ARRAYEXPRESS,ENSG
ENSMUSG00000101249	None	None	None
ENSMUSG00000100131	None	None	None
ENSMUSG00000102070	None	None	None
ENSMUSG00000101939	None	None	None
ENSMUSG00000101645	None	None	None
ENSMUSG00000100862	None	None	None
ENSMUSG00000101111	None	None	None
ENSMUSG00000102398	None	None	None
ENSMUSG00000103037	Pcdhgb1	Pcdhgb1	protocadherin gamma subfamily B, 1 [Source:MGI Symbol;Acc:MGI:1935169]	ARRAYEXPRESS,ENSG
ENSMUSG00000103567	Pcdhga5	Pcdhga5	protocadherin gamma subfamily A, 5 [Source:MGI Symbol;Acc:MGI:1935217]	ARRAYEXPRESS,ENSG
ENSMUSG00000102748	Pcdhgb2	Pcdhgb2	protocadherin gamma subfamily B, 2 [Source:MGI Symbol;Acc:MGI:1935170]	ARRAYEXPRESS,ENSG
ENSMUSG00000103332	Pcdhga2	Pcdhga2	protocadherin gamma subfamily A, 2 [Source:MGI Symbol;Acc:MGI:1935214]	ARRAYEXPRESS,ENSG
ENSMUSG00000103125	None	None	None
ENSMUSG00000103144	Pcdhga1	Pcdhga1	protocadherin gamma subfamily A, 1 [Source:MGI Symbol;Acc:MGI:1935212]	ARRAYEXPRESS,ENSG
ENSMUSG00000102419	None	None	None
ENSMUSG00000103677	Pcdhga4	Pcdhga4	protocadherin gamma subfamily A, 4 [Source:MGI Symbol;Acc:MGI:1935216]	ARRAYEXPRESS,ENSG
ENSMUSG00000102459	None	None	None
ENSMUSG00000102836	None	None	None
ENSMUSG00000103018	None	None	None
ENSMUSG00000103373	None	None	None
ENSMUSG00000105621	Mirlet7f-1	Mirlet7f-1	microRNA let7f-1 [Source:MGI Symbol;Acc:MGI:2676798]	ARRAYEXPRESS,ENSG
ENSMUSG00000105532	None	None	None
ENSMUSG00000107932	None	None	None
ENSMUSG00000108204	None	None	None
ENSMUSG00000107689	None	None	None
ENSMUSG00000108777	None	None	None
ENSMUSG00000109501	None	None	None
ENSMUSG00000109129	None	None	None
ENSMUSG00000109200	None	None	None
ENSMUSG00000035228	Ccdc106	Ccdc106	coiled-coil domain containing 106 [Source:MGI Symbol;Acc:MGI:2385900]	ARRAYEXPRESS,ENSG
ENSMUSG00000043794	None	None	None
ENSMUSG00000110038	None	None	None
ENSMUSG00000110160	None	None	None
ENSMUSG00000110622	Iqcn	Iqcn	IQ motif containing N [Source:MGI Symbol;Acc:MGI:3708784]	ARRAYEXPRESS,ENSG
ENSMUSG00000111059	None	None	None
ENSMUSG00000111055	None	None	None
ENSMUSG00000113519	None	None	None
ENSMUSG00000114156	None	None	None
ENSMUSG00000113205	None	None	None
ENSMUSG00000116793	None	None	None
ENSMUSG00000116840	None	None	None
ENSMUSG00000118527	None	None	None
