# Supplementary material for: Xist RNA binds select autosomal genes and depends on Repeat B to regulate their expression
Source: eLife. 2025 Jun 9;13:RP101197. doi: 10.7554/eLife.101197 (PMC12148325; doi:10.7554/eLife.101197)
Supplement: Supplementary file 5. [file elife-101197-supp5.xlsx]

## Sheet: Sheet1
initial_alias	converted_alias	name	description	namespace
ENSMUSG00000002028	Kmt2a	Kmt2a	lysine (K)-specific methyltransferase 2A [Source:MGI Symbol;Acc:MGI:96995]	ARRAYEXPRESS,ENSG
ENSMUSG00000002803	Btbd6	Btbd6	BTB (POZ) domain containing 6 [Source:MGI Symbol;Acc:MGI:3026623]	ARRAYEXPRESS,ENSG
ENSMUSG00000002885	Adgre5	Adgre5	adhesion G protein-coupled receptor E5 [Source:MGI Symbol;Acc:MGI:1347095]	ARRAYEXPRESS,ENSG
ENSMUSG00000004934	Pias4	Pias4	protein inhibitor of activated STAT 4 [Source:MGI Symbol;Acc:MGI:2136940]	ARRAYEXPRESS,ENSG
ENSMUSG00000005374	Tbl2	Tbl2	transducin (beta)-like 2 [Source:MGI Symbol;Acc:MGI:1351652]	ARRAYEXPRESS,ENSG
ENSMUSG00000006456	Rbm14	Rbm14	RNA binding motif protein 14 [Source:MGI Symbol;Acc:MGI:1929092]	ARRAYEXPRESS,ENSG
ENSMUSG00000024474	Ik	Ik	IK cytokine [Source:MGI Symbol;Acc:MGI:1345142]	ARRAYEXPRESS,ENSG
ENSMUSG00000006850	Tmco6	Tmco6	transmembrane and coiled-coil domains 6 [Source:MGI Symbol;Acc:MGI:1919233]	ARRAYEXPRESS,ENSG
ENSMUSG00000008668	Rps18	Rps18	ribosomal protein S18 [Source:MGI Symbol;Acc:MGI:98146]	ARRAYEXPRESS,ENSG
ENSMUSG00000011158	Brf1	Brf1	BRF1, RNA polymerase III transcription initiation factor 90 kDa subunit [Source:MGI Symbol;Acc:MGI:1919558]	ARRAYEXPRESS,ENSG
ENSMUSG00000012396	Nanog	Nanog	Nanog homeobox [Source:MGI Symbol;Acc:MGI:1919200]	ARRAYEXPRESS,ENSG
ENSMUSG00000014294	Ndufa2	Ndufa2	NADH:ubiquinone oxidoreductase subunit A2 [Source:MGI Symbol;Acc:MGI:1343103]	ARRAYEXPRESS,ENSG
ENSMUSG00000015189	Casd1	Casd1	CAS1 domain containing 1 [Source:MGI Symbol;Acc:MGI:2384865]	ARRAYEXPRESS,ENSG
ENSMUSG00000015656	Hspa8	Hspa8	heat shock protein 8 [Source:MGI Symbol;Acc:MGI:105384]	ARRAYEXPRESS,ENSG
ENSMUSG00000017417	Plxdc1	Plxdc1	plexin domain containing 1 [Source:MGI Symbol;Acc:MGI:1919574]	ARRAYEXPRESS,ENSG
ENSMUSG00000017550	Atad5	Atad5	ATPase family, AAA domain containing 5 [Source:MGI Symbol;Acc:MGI:2442925]	ARRAYEXPRESS,ENSG
ENSMUSG00000018666	Cbx1	Cbx1	chromobox 1 [Source:MGI Symbol;Acc:MGI:105369]	ARRAYEXPRESS,ENSG
ENSMUSG00000005481	Ddx39a	Ddx39a	DEAD box helicase 39a [Source:MGI Symbol;Acc:MGI:1915528]	ARRAYEXPRESS,ENSG
ENSMUSG00000022996	Wnt10b	Wnt10b	wingless-type MMTV integration site family, member 10B [Source:MGI Symbol;Acc:MGI:108061]	ARRAYEXPRESS,ENSG
ENSMUSG00000023020	Cox14	Cox14	cytochrome c oxidase assembly protein 14 [Source:MGI Symbol;Acc:MGI:1913629]	ARRAYEXPRESS,ENSG
ENSMUSG00000023021	Cers5	Cers5	ceramide synthase 5 [Source:MGI Symbol;Acc:MGI:1919199]	ARRAYEXPRESS,ENSG
ENSMUSG00000023156	Htd2	Rpp14	ribonuclease P 14 subunit [Source:MGI Symbol;Acc:MGI:1914303]	ARRAYEXPRESS,ENSG
ENSMUSG00000023156	Rpp14	Rpp14	ribonuclease P 14 subunit [Source:MGI Symbol;Acc:MGI:1914303]	ARRAYEXPRESS,ENSG
ENSMUSG00000024121	Atp6v0c	Atp6v0c	ATPase, H+ transporting, lysosomal V0 subunit C [Source:MGI Symbol;Acc:MGI:88116]	ARRAYEXPRESS,ENSG
ENSMUSG00000024312	Wdr46	Wdr46	WD repeat domain 46 [Source:MGI Symbol;Acc:MGI:1931871]	ARRAYEXPRESS,ENSG
ENSMUSG00000024319	Vps52	Vps52	VPS52 GARP complex subunit [Source:MGI Symbol;Acc:MGI:1330304]	ARRAYEXPRESS,ENSG
ENSMUSG00000024758	Rtn3	Rtn3	reticulon 3 [Source:MGI Symbol;Acc:MGI:1339970]	ARRAYEXPRESS,ENSG
ENSMUSG00000024816	Frmd8	Frmd8	FERM domain containing 8 [Source:MGI Symbol;Acc:MGI:1914707]	ARRAYEXPRESS,ENSG
ENSMUSG00000025602	Zfp202	Zfp202	zinc finger protein 202 [Source:MGI Symbol;Acc:MGI:1933401]	ARRAYEXPRESS,ENSG
ENSMUSG00000025920	Stau2	Stau2	staufen double-stranded RNA binding protein 2 [Source:MGI Symbol;Acc:MGI:1352508]	ARRAYEXPRESS,ENSG
ENSMUSG00000026153	Fam135a	Fam135a	family with sequence similarity 135, member A [Source:MGI Symbol;Acc:MGI:1915437]	ARRAYEXPRESS,ENSG
ENSMUSG00000026500	Cox20	Cox20	cytochrome c oxidase assembly protein 20 [Source:MGI Symbol;Acc:MGI:1913609]	ARRAYEXPRESS,ENSG
ENSMUSG00000026511	Srp9	Srp9	signal recognition particle 9 [Source:MGI Symbol;Acc:MGI:1350930]	ARRAYEXPRESS,ENSG
ENSMUSG00000027358	Bmp2	Bmp2	bone morphogenetic protein 2 [Source:MGI Symbol;Acc:MGI:88177]	ARRAYEXPRESS,ENSG
ENSMUSG00000027582	Zgpat	Zgpat	zinc finger, CCCH-type with G patch domain [Source:MGI Symbol;Acc:MGI:2449939]	ARRAYEXPRESS,ENSG
ENSMUSG00000027942	4933434E20Rik	4933434E20Rik	RIKEN cDNA 4933434E20 gene [Source:MGI Symbol;Acc:MGI:1914027]	ARRAYEXPRESS,ENSG
ENSMUSG00000042520	Ubap2l	Ubap2l	ubiquitin-associated protein 2-like [Source:MGI Symbol;Acc:MGI:1921633]	ARRAYEXPRESS,ENSG
ENSMUSG00000028419	Chmp5	Chmp5	charged multivesicular body protein 5 [Source:MGI Symbol;Acc:MGI:1924209]	ARRAYEXPRESS,ENSG
ENSMUSG00000028423	Nfx1	Nfx1	nuclear transcription factor, X-box binding 1 [Source:MGI Symbol;Acc:MGI:1921414]	ARRAYEXPRESS,ENSG
ENSMUSG00000028926	Cdk14	Cdk14	cyclin dependent kinase 14 [Source:MGI Symbol;Acc:MGI:894318]	ARRAYEXPRESS,ENSG
ENSMUSG00000029681	Bcl7b	Bcl7b	B cell CLL/lymphoma 7B [Source:MGI Symbol;Acc:MGI:1332238]	ARRAYEXPRESS,ENSG
ENSMUSG00000030007	Cct7	Cct7	chaperonin containing Tcp1, subunit 7 (eta) [Source:MGI Symbol;Acc:MGI:107184]	ARRAYEXPRESS,ENSG
ENSMUSG00000030008	Pradc1	Pradc1	protease-associated domain containing 1 [Source:MGI Symbol;Acc:MGI:1920577]	ARRAYEXPRESS,ENSG
ENSMUSG00000003153	Slc2a3	Slc2a3	solute carrier family 2 (facilitated glucose transporter), member 3 [Source:MGI Symbol;Acc:MGI:95757]	ARRAYEXPRESS,ENSG
ENSMUSG00000030512	Snrpa1	Snrpa1	small nuclear ribonucleoprotein polypeptide A' [Source:MGI Symbol;Acc:MGI:1916231]	ARRAYEXPRESS,ENSG
ENSMUSG00000031652	N4bp1	N4bp1	NEDD4 binding protein 1 [Source:MGI Symbol;Acc:MGI:2136825]	ARRAYEXPRESS,ENSG
ENSMUSG00000032030	Cul5	Cul5	cullin 5 [Source:MGI Symbol;Acc:MGI:1922967]	ARRAYEXPRESS,ENSG
ENSMUSG00000039756	Dnttip2	Dnttip2	deoxynucleotidyltransferase, terminal, interacting protein 2 [Source:MGI Symbol;Acc:MGI:1923173]	ARRAYEXPRESS,ENSG
ENSMUSG00000033885	Pxk	Pxk	PX domain containing serine/threonine kinase [Source:MGI Symbol;Acc:MGI:1289230]	ARRAYEXPRESS,ENSG
ENSMUSG00000039630	Hnrnpu	Hnrnpu	heterogeneous nuclear ribonucleoprotein U [Source:MGI Symbol;Acc:MGI:1858195]	ARRAYEXPRESS,ENSG
ENSMUSG00000036473	Tbc1d24	Tbc1d24	TBC1 domain family, member 24 [Source:MGI Symbol;Acc:MGI:2443456]	ARRAYEXPRESS,ENSG
ENSMUSG00000036820	Amdhd2	Amdhd2	amidohydrolase domain containing 2 [Source:MGI Symbol;Acc:MGI:2443978]	ARRAYEXPRESS,ENSG
ENSMUSG00000041773	Enc1	Enc1	ectodermal-neural cortex 1 [Source:MGI Symbol;Acc:MGI:109610]	ARRAYEXPRESS,ENSG
ENSMUSG00000035109	Shc4	Shc4	SHC (Src homology 2 domain containing) family, member 4 [Source:MGI Symbol;Acc:MGI:2655364]	ARRAYEXPRESS,ENSG
ENSMUSG00000038352	Arl5c	Arl5c	ADP-ribosylation factor-like 5C [Source:MGI Symbol;Acc:MGI:3028577]	ARRAYEXPRESS,ENSG
ENSMUSG00000021098	4930447C04Rik	4930447C04Rik	RIKEN cDNA 4930447C04 gene [Source:MGI Symbol;Acc:MGI:1923051]	ARRAYEXPRESS,ENSG
ENSMUSG00000036480	Prss56	Prss56	protease, serine 56 [Source:MGI Symbol;Acc:MGI:1916703]	ARRAYEXPRESS,ENSG
ENSMUSG00000039239	Tgfb2	Tgfb2	transforming growth factor, beta 2 [Source:MGI Symbol;Acc:MGI:98726]	ARRAYEXPRESS,ENSG
ENSMUSG00000025738	Fbxl16	Fbxl16	F-box and leucine-rich repeat protein 16 [Source:MGI Symbol;Acc:MGI:2448488]	ARRAYEXPRESS,ENSG
ENSMUSG00000033706	Smyd5	Smyd5	SET and MYND domain containing 5 [Source:MGI Symbol;Acc:MGI:108048]	ARRAYEXPRESS,ENSG
ENSMUSG00000042388	Dlgap3	Dlgap3	DLG associated protein 3 [Source:MGI Symbol;Acc:MGI:3039563]	ARRAYEXPRESS,ENSG
ENSMUSG00000035992	Fnip1	Fnip1	folliculin interacting protein 1 [Source:MGI Symbol;Acc:MGI:2444668]	ARRAYEXPRESS,ENSG
ENSMUSG00000034994	Eef2	Eef2	eukaryotic translation elongation factor 2 [Source:MGI Symbol;Acc:MGI:95288]	ARRAYEXPRESS,ENSG
ENSMUSG00000038671	Arfrp1	Arfrp1	ADP-ribosylation factor related protein 1 [Source:MGI Symbol;Acc:MGI:1923938]	ARRAYEXPRESS,ENSG
ENSMUSG00000038685	Rtel1	Rtel1	regulator of telomere elongation helicase 1 [Source:MGI Symbol;Acc:MGI:2139369]	ARRAYEXPRESS,ENSG
ENSMUSG00000046733	Gprc5a	Gprc5a	G protein-coupled receptor, family C, group 5, member A [Source:MGI Symbol;Acc:MGI:1891250]	ARRAYEXPRESS,ENSG
ENSMUSG00000047053	Teddm1a	Teddm1a	transmembrane epididymal protein 1A [Source:MGI Symbol;Acc:MGI:2668439]	ARRAYEXPRESS,ENSG
ENSMUSG00000047719	Ubiad1	Ubiad1	UbiA prenyltransferase domain containing 1 [Source:MGI Symbol;Acc:MGI:1918957]	ARRAYEXPRESS,ENSG
ENSMUSG00000050043	Tmx2	Tmx2	thioredoxin-related transmembrane protein 2 [Source:MGI Symbol;Acc:MGI:1914208]	ARRAYEXPRESS,ENSG
ENSMUSG00000019737	Syne4	Syne4	spectrin repeat containing, nuclear envelope family member 4 [Source:MGI Symbol;Acc:MGI:2141950]	ARRAYEXPRESS,ENSG
ENSMUSG00000032387	Rbpms2	Rbpms2	RNA binding protein with multiple splicing 2 [Source:MGI Symbol;Acc:MGI:1919223]	ARRAYEXPRESS,ENSG
ENSMUSG00000034832	Tet3	Tet3	tet methylcytosine dioxygenase 3 [Source:MGI Symbol;Acc:MGI:2446229]	ARRAYEXPRESS,ENSG
ENSMUSG00000049336	Tenm2	Tenm2	teneurin transmembrane protein 2 [Source:MGI Symbol;Acc:MGI:1345184]	ARRAYEXPRESS,ENSG
ENSMUSG00000028991	Mtor	Mtor	mechanistic target of rapamycin kinase [Source:MGI Symbol;Acc:MGI:1928394]	ARRAYEXPRESS,ENSG
ENSMUSG00000047749	Zc3hav1l	Zc3hav1l	zinc finger CCCH-type, antiviral 1-like [Source:MGI Symbol;Acc:MGI:2443387]	ARRAYEXPRESS,ENSG
ENSMUSG00000048004	Tmem196	Tmem196	transmembrane protein 196 [Source:MGI Symbol;Acc:MGI:2685374]	ARRAYEXPRESS,ENSG
ENSMUSG00000042831	Alkbh6	Alkbh6	alkB homolog 6 [Source:MGI Symbol;Acc:MGI:2142037]	ARRAYEXPRESS,ENSG
ENSMUSG00000035376	Hacd2	Hacd2	3-hydroxyacyl-CoA dehydratase 2 [Source:MGI Symbol;Acc:MGI:1918007]	ARRAYEXPRESS,ENSG
ENSMUSG00000017561	Crlf3	Crlf3	cytokine receptor-like factor 3 [Source:MGI Symbol;Acc:MGI:1860086]	ARRAYEXPRESS,ENSG
ENSMUSG00000048109	Rbm15	Rbm15	RNA binding motif protein 15 [Source:MGI Symbol;Acc:MGI:2443205]	ARRAYEXPRESS,ENSG
ENSMUSG00000051095	Or6x1	Or6x1	olfactory receptor family 6 subfamily X member 1 [Source:MGI Symbol;Acc:MGI:3030820]	ARRAYEXPRESS,ENSG
ENSMUSG00000043290	Zfp784	Zfp784	zinc finger protein 784 [Source:MGI Symbol;Acc:MGI:3606042]	ARRAYEXPRESS,ENSG
ENSMUSG00000051844	B230319C09Rik	B230319C09Rik	RIKEN cDNA B230319C09 gene [Source:MGI Symbol;Acc:MGI:2444713]	ARRAYEXPRESS,ENSG
ENSMUSG00000023764	Sfi1	Sfi1	Sfi1 homolog, spindle assembly associated (yeast) [Source:MGI Symbol;Acc:MGI:1926137]	ARRAYEXPRESS,ENSG
ENSMUSG00000030077	Chl1	Chl1	cell adhesion molecule L1-like [Source:MGI Symbol;Acc:MGI:1098266]	ARRAYEXPRESS,ENSG
ENSMUSG00000055523	Gucy2g	Gucy2g	guanylate cyclase 2g [Source:MGI Symbol;Acc:MGI:106025]	ARRAYEXPRESS,ENSG
ENSMUSG00000098505	Gm14496	Gm14496	predicted gene 14496 [Source:MGI Symbol;Acc:MGI:3769929]	ARRAYEXPRESS,ENSG
ENSMUSG00000057359	None	None	None
ENSMUSG00000026251	Chrnd	Chrnd	cholinergic receptor, nicotinic, delta polypeptide [Source:MGI Symbol;Acc:MGI:87893]	ARRAYEXPRESS,ENSG
ENSMUSG00000021782	Dlg5	Dlg5	discs large MAGUK scaffold protein 5 [Source:MGI Symbol;Acc:MGI:1918478]	ARRAYEXPRESS,ENSG
ENSMUSG00000030319	Cand2	Cand2	cullin-associated and neddylation-dissociated 2 (putative) [Source:MGI Symbol;Acc:MGI:1914338]	ARRAYEXPRESS,ENSG
ENSMUSG00000074405	Zfp865	Zfp865	zinc finger protein 865 [Source:MGI Symbol;Acc:MGI:2442656]	ARRAYEXPRESS,ENSG
ENSMUSG00000038143	Stox2	Stox2	storkhead box 2 [Source:MGI Symbol;Acc:MGI:1918319]	ARRAYEXPRESS,ENSG
ENSMUSG00000043962	Thrap3	Thrap3	thyroid hormone receptor associated protein 3 [Source:MGI Symbol;Acc:MGI:2442637]	ARRAYEXPRESS,ENSG
ENSMUSG00000033788	Dysf	Dysf	dysferlin [Source:MGI Symbol;Acc:MGI:1349385]	ARRAYEXPRESS,ENSG
ENSMUSG00000064648	None	None	None
ENSMUSG00000119805	None	None	None
ENSMUSG00000065421	Mirlet7a-1	Mirlet7a-1	microRNA let7a-1 [Source:MGI Symbol;Acc:MGI:2676793]	ARRAYEXPRESS,ENSG
ENSMUSG00000065453	Mirlet7d	Mirlet7d	microRNA let7d [Source:MGI Symbol;Acc:MGI:2676796]	ARRAYEXPRESS,ENSG
ENSMUSG00000026473	Glul	Glul	glutamate-ammonia ligase (glutamine synthetase) [Source:MGI Symbol;Acc:MGI:95739]	ARRAYEXPRESS,ENSG
ENSMUSG00000067370	B3galt4	B3galt4	UDP-Gal:betaGlcNAc beta 1,3-galactosyltransferase, polypeptide 4 [Source:MGI Symbol;Acc:MGI:1859517]	ARRAYEXPRESS,ENSG
ENSMUSG00000071064	Zfp827	Zfp827	zinc finger protein 827 [Source:MGI Symbol;Acc:MGI:2444807]	ARRAYEXPRESS,ENSG
ENSMUSG00000067736	None	None	None
ENSMUSG00000068394	Cep152	Cep152	centrosomal protein 152 [Source:MGI Symbol;Acc:MGI:2139083]	ARRAYEXPRESS,ENSG
ENSMUSG00000025809	Itgb1	Itgb1	integrin beta 1 (fibronectin receptor beta) [Source:MGI Symbol;Acc:MGI:96610]	ARRAYEXPRESS,ENSG
ENSMUSG00000070000	Fcho1	Fcho1	FCH domain only 1 [Source:MGI Symbol;Acc:MGI:1921265]	ARRAYEXPRESS,ENSG
ENSMUSG00000071076	Jund	Jund	jun D proto-oncogene [Source:MGI Symbol;Acc:MGI:96648]	ARRAYEXPRESS,ENSG
ENSMUSG00000071341	Egr4	Egr4	early growth response 4 [Source:MGI Symbol;Acc:MGI:99252]	ARRAYEXPRESS,ENSG
ENSMUSG00000021395	Spin1	Spin1	spindlin 1 [Source:MGI Symbol;Acc:MGI:109242]	ARRAYEXPRESS,ENSG
ENSMUSG00000074211	Sdhaf1	Sdhaf1	succinate dehydrogenase complex assembly factor 1 [Source:MGI Symbol;Acc:MGI:1915582]	ARRAYEXPRESS,ENSG
ENSMUSG00000075701	Selenos	Selenos	selenoprotein S [Source:MGI Symbol;Acc:MGI:95994]	ARRAYEXPRESS,ENSG
ENSMUSG00000118706	None	None	None
ENSMUSG00000027080	Med19	Med19	mediator complex subunit 19 [Source:MGI Symbol;Acc:MGI:1914234]	ARRAYEXPRESS,ENSG
ENSMUSG00000076437	Selenoh	Selenoh	selenoprotein H [Source:MGI Symbol;Acc:MGI:1919907]	ARRAYEXPRESS,ENSG
ENSMUSG00000076456	Mir760	Mir760	microRNA 760 [Source:MGI Symbol;Acc:MGI:3691613]	ARRAYEXPRESS,ENSG
ENSMUSG00000047213	Ythdf3	Ythdf3	YTH N6-methyladenosine RNA binding protein 3 [Source:MGI Symbol;Acc:MGI:1918850]	ARRAYEXPRESS,ENSG
ENSMUSG00000029826	Zc3hav1	Zc3hav1	zinc finger CCCH type, antiviral 1 [Source:MGI Symbol;Acc:MGI:1926031]	ARRAYEXPRESS,ENSG
ENSMUSG00000080058	None	None	None
ENSMUSG00000081249	None	None	None
ENSMUSG00000033182	Kbtbd12	Kbtbd12	kelch repeat and BTB (POZ) domain containing 12 [Source:MGI Symbol;Acc:MGI:1918481]	ARRAYEXPRESS,ENSG
ENSMUSG00000084504	Gm25323	Gm25323	predicted gene, 25323 [Source:MGI Symbol;Acc:MGI:5455100]	ARRAYEXPRESS,ENSG
ENSMUSG00000084601	Gm23111	Gm23111	predicted gene, 23111 [Source:MGI Symbol;Acc:MGI:5452888]	ARRAYEXPRESS,ENSG
ENSMUSG00000045968	Teddm2	Teddm2	transmembrane epididymal family member 2 [Source:MGI Symbol;Acc:MGI:1923273]	ARRAYEXPRESS,ENSG
ENSMUSG00000086604	Gm15510	Gm15510	predicted gene 15510 [Source:MGI Symbol;Acc:MGI:3782958]	ARRAYEXPRESS,ENSG
ENSMUSG00000086598	Btbd18	Btbd18	BTB (POZ) domain containing 18 [Source:MGI Symbol;Acc:MGI:3650217]	ARRAYEXPRESS,ENSG
ENSMUSG00000043488	None	None	None
ENSMUSG00000086350	None	None	None
ENSMUSG00000042380	Smim12	Smim12	small integral membrane protein 12 [Source:MGI Symbol;Acc:MGI:1933141]	ARRAYEXPRESS,ENSG
ENSMUSG00000086914	Gm16124	Gm16124	predicted gene 16124 [Source:MGI Symbol;Acc:MGI:3802001]	ARRAYEXPRESS,ENSG
ENSMUSG00000047013	Fbxo41	Fbxo41	F-box protein 41 [Source:MGI Symbol;Acc:MGI:1261912]	ARRAYEXPRESS,ENSG
ENSMUSG00000020457	Drg1	Drg1	developmentally regulated GTP binding protein 1 [Source:MGI Symbol;Acc:MGI:1343297]	ARRAYEXPRESS,ENSG
ENSMUSG00000053080	Zfta	Zfta	zinc finger translocation associated [Source:MGI Symbol;Acc:MGI:1919667]	ARRAYEXPRESS,ENSG
ENSMUSG00000090005	None	None	None
ENSMUSG00000096755	None	None	None
ENSMUSG00000032097	Ddx6	Ddx6	DEAD (Asp-Glu-Ala-Asp) box polypeptide 6 [Source:MGI Symbol;Acc:MGI:104976]	ARRAYEXPRESS,ENSG
ENSMUSG00000096370	Gm21992	Gm21992	predicted gene 21992 [Source:MGI Symbol;Acc:MGI:5439461]	ARRAYEXPRESS,ENSG
ENSMUSG00000092274	Neat1	Neat1	nuclear paraspeckle assembly transcript 1 (non-protein coding) [Source:MGI Symbol;Acc:MGI:1914211]	ARRAYEXPRESS,ENSG
ENSMUSG00000095913	None	None	None
ENSMUSG00000097375	None	None	None
ENSMUSG00000097513	None	None	None
ENSMUSG00000099227	Mir8114	Mir8114	microRNA 8114 [Source:MGI Symbol;Acc:MGI:5530764]	ARRAYEXPRESS,ENSG
ENSMUSG00000099163	Mir7660	Mir7660	microRNA 7660 [Source:MGI Symbol;Acc:MGI:5531094]	ARRAYEXPRESS,ENSG
ENSMUSG00000098293	Mir6991	Mir6991	microRNA 6991 [Source:MGI Symbol;Acc:MGI:5531348]	ARRAYEXPRESS,ENSG
ENSMUSG00000098465	Mir1668	Mir1668	microRNA 1668 [Source:MGI Symbol;Acc:MGI:5530972]	ARRAYEXPRESS,ENSG
ENSMUSG00000098434	None	None	None
ENSMUSG00000026277	Stk25	Stk25	serine/threonine kinase 25 (yeast) [Source:MGI Symbol;Acc:MGI:1891699]	ARRAYEXPRESS,ENSG
ENSMUSG00000101249	None	None	None
ENSMUSG00000100131	None	None	None
ENSMUSG00000102070	None	None	None
ENSMUSG00000101939	None	None	None
ENSMUSG00000101645	None	None	None
ENSMUSG00000099452	None	None	None
ENSMUSG00000100862	None	None	None
ENSMUSG00000101111	None	None	None
ENSMUSG00000102398	None	None	None
ENSMUSG00000102459	None	None	None
ENSMUSG00000103018	None	None	None
ENSMUSG00000103373	None	None	None
ENSMUSG00000028121	Bcar3	Bcar3	breast cancer anti-estrogen resistance 3 [Source:MGI Symbol;Acc:MGI:1352501]	ARRAYEXPRESS,ENSG
ENSMUSG00000105057	None	None	None
ENSMUSG00000105621	Mirlet7f-1	Mirlet7f-1	microRNA let7f-1 [Source:MGI Symbol;Acc:MGI:2676798]	ARRAYEXPRESS,ENSG
ENSMUSG00000105532	None	None	None
ENSMUSG00000104727	None	None	None
ENSMUSG00000106275	None	None	None
ENSMUSG00000107932	None	None	None
ENSMUSG00000108204	None	None	None
ENSMUSG00000108777	None	None	None
ENSMUSG00000109129	None	None	None
ENSMUSG00000035228	Ccdc106	Ccdc106	coiled-coil domain containing 106 [Source:MGI Symbol;Acc:MGI:2385900]	ARRAYEXPRESS,ENSG
ENSMUSG00000110669	None	None	None
ENSMUSG00000110622	Iqcn	Iqcn	IQ motif containing N [Source:MGI Symbol;Acc:MGI:3708784]	ARRAYEXPRESS,ENSG
ENSMUSG00000110773	None	None	None
ENSMUSG00000111059	None	None	None
ENSMUSG00000111301	None	None	None
ENSMUSG00000111656	None	None	None
ENSMUSG00000110721	None	None	None
ENSMUSG00000113519	None	None	None
ENSMUSG00000116728	None	None	None
ENSMUSG00000116840	None	None	None
ENSMUSG00000118504	None	None	None
