# Supplementary material for: Xist RNA binds select autosomal genes and depends on Repeat B to regulate their expression
Source: eLife. 2025 Jun 9;13:RP101197. doi: 10.7554/eLife.101197 (PMC12148325; doi:10.7554/eLife.101197)
Supplement: Supplementary file 6. [file elife-101197-supp6.xlsx]

## Sheet: Sheet1
initial_alias	converted_alias	name	description	namespace
ENSMUSG00000006456	Rbm14	Rbm14	RNA binding motif protein 14 [Source:MGI Symbol;Acc:MGI:1929092]	ARRAYEXPRESS,ENSG
ENSMUSG00000008668	Rps18	Rps18	ribosomal protein S18 [Source:MGI Symbol;Acc:MGI:98146]	ARRAYEXPRESS,ENSG
ENSMUSG00000017144	Rnd3	Rnd3	Rho family GTPase 3 [Source:MGI Symbol;Acc:MGI:1921444]	ARRAYEXPRESS,ENSG
ENSMUSG00000028708	Mknk1	Mknk1	MAP kinase-interacting serine/threonine kinase 1 [Source:MGI Symbol;Acc:MGI:894316]	ARRAYEXPRESS,ENSG
ENSMUSG00000021025	Nfkbia	Nfkbia	nuclear factor of kappa light polypeptide gene enhancer in B cells inhibitor, alpha [Source:MGI Symbol;Acc:MGI:104741]	ARRAYEXPRESS,ENSG
ENSMUSG00000024121	Atp6v0c	Atp6v0c	ATPase, H+ transporting, lysosomal V0 subunit C [Source:MGI Symbol;Acc:MGI:88116]	ARRAYEXPRESS,ENSG
ENSMUSG00000024242	Map4k3	Map4k3	mitogen-activated protein kinase kinase kinase kinase 3 [Source:MGI Symbol;Acc:MGI:2154405]	ARRAYEXPRESS,ENSG
ENSMUSG00000024312	Wdr46	Wdr46	WD repeat domain 46 [Source:MGI Symbol;Acc:MGI:1931871]	ARRAYEXPRESS,ENSG
ENSMUSG00000024319	Vps52	Vps52	VPS52 GARP complex subunit [Source:MGI Symbol;Acc:MGI:1330304]	ARRAYEXPRESS,ENSG
ENSMUSG00000025219	Fgf8	Fgf8	fibroblast growth factor 8 [Source:MGI Symbol;Acc:MGI:99604]	ARRAYEXPRESS,ENSG
ENSMUSG00000025220	Oga	Oga	O-GlcNAcase [Source:MGI Symbol;Acc:MGI:1932139]	ARRAYEXPRESS,ENSG
ENSMUSG00000026153	Fam135a	Fam135a	family with sequence similarity 135, member A [Source:MGI Symbol;Acc:MGI:1915437]	ARRAYEXPRESS,ENSG
ENSMUSG00000027582	Zgpat	Zgpat	zinc finger, CCCH-type with G patch domain [Source:MGI Symbol;Acc:MGI:2449939]	ARRAYEXPRESS,ENSG
ENSMUSG00000028410	Dnaja1	Dnaja1	DnaJ heat shock protein family (Hsp40) member A1 [Source:MGI Symbol;Acc:MGI:1270129]	ARRAYEXPRESS,ENSG
ENSMUSG00000028709	Mob3c	Mob3c	MOB kinase activator 3C [Source:MGI Symbol;Acc:MGI:2140623]	ARRAYEXPRESS,ENSG
ENSMUSG00000039841	Zfp800	Zfp800	zinc finger protein 800 [Source:MGI Symbol;Acc:MGI:1889334]	ARRAYEXPRESS,ENSG
ENSMUSG00000034295	Fhod3	Fhod3	formin homology 2 domain containing 3 [Source:MGI Symbol;Acc:MGI:1925847]	ARRAYEXPRESS,ENSG
ENSMUSG00000036473	Tbc1d24	Tbc1d24	TBC1 domain family, member 24 [Source:MGI Symbol;Acc:MGI:2443456]	ARRAYEXPRESS,ENSG
ENSMUSG00000036820	Amdhd2	Amdhd2	amidohydrolase domain containing 2 [Source:MGI Symbol;Acc:MGI:2443978]	ARRAYEXPRESS,ENSG
ENSMUSG00000035109	Shc4	Shc4	SHC (Src homology 2 domain containing) family, member 4 [Source:MGI Symbol;Acc:MGI:2655364]	ARRAYEXPRESS,ENSG
ENSMUSG00000038056	Kmt2c	Kmt2c	lysine (K)-specific methyltransferase 2C [Source:MGI Symbol;Acc:MGI:2444959]	ARRAYEXPRESS,ENSG
ENSMUSG00000039286	Fndc3b	Fndc3b	fibronectin type III domain containing 3B [Source:MGI Symbol;Acc:MGI:1919257]	ARRAYEXPRESS,ENSG
ENSMUSG00000021493	Pdlim7	Pdlim7	PDZ and LIM domain 7 [Source:MGI Symbol;Acc:MGI:1914649]	ARRAYEXPRESS,ENSG
ENSMUSG00000035992	Fnip1	Fnip1	folliculin interacting protein 1 [Source:MGI Symbol;Acc:MGI:2444668]	ARRAYEXPRESS,ENSG
ENSMUSG00000035711	Dok3	Dok3	docking protein 3 [Source:MGI Symbol;Acc:MGI:1351490]	ARRAYEXPRESS,ENSG
ENSMUSG00000038671	Arfrp1	Arfrp1	ADP-ribosylation factor related protein 1 [Source:MGI Symbol;Acc:MGI:1923938]	ARRAYEXPRESS,ENSG
ENSMUSG00000033031	Cip2a	Cip2a	cell proliferation regulating inhibitor of protein phosphatase 2A [Source:MGI Symbol;Acc:MGI:2146335]	ARRAYEXPRESS,ENSG
ENSMUSG00000038685	Rtel1	Rtel1	regulator of telomere elongation helicase 1 [Source:MGI Symbol;Acc:MGI:2139369]	ARRAYEXPRESS,ENSG
ENSMUSG00000030823	9130019O22Rik	9130019O22Rik	RIKEN cDNA 9130019O22 gene [Source:MGI Symbol;Acc:MGI:1926171]	ARRAYEXPRESS,ENSG
ENSMUSG00000047719	Ubiad1	Ubiad1	UbiA prenyltransferase domain containing 1 [Source:MGI Symbol;Acc:MGI:1918957]	ARRAYEXPRESS,ENSG
ENSMUSG00000045210	Vcpip1	Vcpip1	valosin containing protein (p97)/p47 complex interacting protein 1 [Source:MGI Symbol;Acc:MGI:1917925]	ARRAYEXPRESS,ENSG
ENSMUSG00000028991	Mtor	Mtor	mechanistic target of rapamycin kinase [Source:MGI Symbol;Acc:MGI:1928394]	ARRAYEXPRESS,ENSG
ENSMUSG00000048004	Tmem196	Tmem196	transmembrane protein 196 [Source:MGI Symbol;Acc:MGI:2685374]	ARRAYEXPRESS,ENSG
ENSMUSG00000035376	Hacd2	Hacd2	3-hydroxyacyl-CoA dehydratase 2 [Source:MGI Symbol;Acc:MGI:1918007]	ARRAYEXPRESS,ENSG
ENSMUSG00000047514	Tspyl1	Tspyl1	testis-specific protein, Y-encoded-like 1 [Source:MGI Symbol;Acc:MGI:1298395]	ARRAYEXPRESS,ENSG
ENSMUSG00000048109	Rbm15	Rbm15	RNA binding motif protein 15 [Source:MGI Symbol;Acc:MGI:2443205]	ARRAYEXPRESS,ENSG
ENSMUSG00000043290	Zfp784	Zfp784	zinc finger protein 784 [Source:MGI Symbol;Acc:MGI:3606042]	ARRAYEXPRESS,ENSG
ENSMUSG00000042985	Upk3b	Upk3b	uroplakin 3B [Source:MGI Symbol;Acc:MGI:2140882]	ARRAYEXPRESS,ENSG
ENSMUSG00000030077	Chl1	Chl1	cell adhesion molecule L1-like [Source:MGI Symbol;Acc:MGI:1098266]	ARRAYEXPRESS,ENSG
ENSMUSG00000054381	Zfp747	Zfp747	zinc finger protein 747 [Source:MGI Symbol;Acc:MGI:2443581]	ARRAYEXPRESS,ENSG
ENSMUSG00000054957	None	None	None
ENSMUSG00000056209	Npm3	Npm3	nucleoplasmin 3 [Source:MGI Symbol;Acc:MGI:894653]	ARRAYEXPRESS,ENSG
ENSMUSG00000098505	Gm14496	Gm14496	predicted gene 14496 [Source:MGI Symbol;Acc:MGI:3769929]	ARRAYEXPRESS,ENSG
ENSMUSG00000030319	Cand2	Cand2	cullin-associated and neddylation-dissociated 2 (putative) [Source:MGI Symbol;Acc:MGI:1914338]	ARRAYEXPRESS,ENSG
ENSMUSG00000074405	Zfp865	Zfp865	zinc finger protein 865 [Source:MGI Symbol;Acc:MGI:2442656]	ARRAYEXPRESS,ENSG
ENSMUSG00000064648	None	None	None
ENSMUSG00000065421	Mirlet7a-1	Mirlet7a-1	microRNA let7a-1 [Source:MGI Symbol;Acc:MGI:2676793]	ARRAYEXPRESS,ENSG
ENSMUSG00000065452	Mir207	Mir207	microRNA 207 [Source:MGI Symbol;Acc:MGI:2676882]	ARRAYEXPRESS,ENSG
ENSMUSG00000065453	Mirlet7d	Mirlet7d	microRNA let7d [Source:MGI Symbol;Acc:MGI:2676796]	ARRAYEXPRESS,ENSG
ENSMUSG00000042589	Cux2	Cux2	cut-like homeobox 2 [Source:MGI Symbol;Acc:MGI:107321]	ARRAYEXPRESS,ENSG
ENSMUSG00000067370	B3galt4	B3galt4	UDP-Gal:betaGlcNAc beta 1,3-galactosyltransferase, polypeptide 4 [Source:MGI Symbol;Acc:MGI:1859517]	ARRAYEXPRESS,ENSG
ENSMUSG00000067736	None	None	None
ENSMUSG00000068394	Cep152	Cep152	centrosomal protein 152 [Source:MGI Symbol;Acc:MGI:2139083]	ARRAYEXPRESS,ENSG
ENSMUSG00000071076	Jund	Jund	jun D proto-oncogene [Source:MGI Symbol;Acc:MGI:96648]	ARRAYEXPRESS,ENSG
ENSMUSG00000021395	Spin1	Spin1	spindlin 1 [Source:MGI Symbol;Acc:MGI:109242]	ARRAYEXPRESS,ENSG
ENSMUSG00000064061	Dzip3	Dzip3	DAZ interacting protein 3, zinc finger [Source:MGI Symbol;Acc:MGI:1917433]	ARRAYEXPRESS,ENSG
ENSMUSG00000080058	None	None	None
ENSMUSG00000063455	D630045J12Rik	D630045J12Rik	RIKEN cDNA D630045J12 gene [Source:MGI Symbol;Acc:MGI:2669829]	ARRAYEXPRESS,ENSG
ENSMUSG00000082008	None	None	None
ENSMUSG00000084601	Gm23111	Gm23111	predicted gene, 23111 [Source:MGI Symbol;Acc:MGI:5452888]	ARRAYEXPRESS,ENSG
ENSMUSG00000086604	Gm15510	Gm15510	predicted gene 15510 [Source:MGI Symbol;Acc:MGI:3782958]	ARRAYEXPRESS,ENSG
ENSMUSG00000039480	Nt5dc1	Nt5dc1	5'-nucleotidase domain containing 1 [Source:MGI Symbol;Acc:MGI:2442446]	ARRAYEXPRESS,ENSG
ENSMUSG00000087367	None	None	None
ENSMUSG00000006143	Upk3bl	Upk3bl	uroplakin 3B-like [Source:MGI Symbol;Acc:MGI:1916915]	ARRAYEXPRESS,ENSG
ENSMUSG00000043340	None	None	None
ENSMUSG00000030660	Pik3c2a	Pik3c2a	phosphatidylinositol-4-phosphate 3-kinase catalytic subunit type 2 alpha [Source:MGI Symbol;Acc:MGI:1203729]	ARRAYEXPRESS,ENSG
ENSMUSG00000096370	Gm21992	Gm21992	predicted gene 21992 [Source:MGI Symbol;Acc:MGI:5439461]	ARRAYEXPRESS,ENSG
ENSMUSG00000095913	None	None	None
ENSMUSG00000097893	None	None	None
ENSMUSG00000097375	None	None	None
ENSMUSG00000099163	Mir7660	Mir7660	microRNA 7660 [Source:MGI Symbol;Acc:MGI:5531094]	ARRAYEXPRESS,ENSG
ENSMUSG00000099096	Mir6945	Mir6945	microRNA 6945 [Source:MGI Symbol;Acc:MGI:5531161]	ARRAYEXPRESS,ENSG
ENSMUSG00000101249	None	None	None
ENSMUSG00000100131	None	None	None
ENSMUSG00000102070	None	None	None
ENSMUSG00000101939	None	None	None
ENSMUSG00000099452	None	None	None
ENSMUSG00000100862	None	None	None
ENSMUSG00000101111	None	None	None
ENSMUSG00000102398	None	None	None
ENSMUSG00000103373	None	None	None
ENSMUSG00000105621	Mirlet7f-1	Mirlet7f-1	microRNA let7f-1 [Source:MGI Symbol;Acc:MGI:2676798]	ARRAYEXPRESS,ENSG
ENSMUSG00000105532	None	None	None
ENSMUSG00000108204	None	None	None
ENSMUSG00000108461	None	None	None
ENSMUSG00000109129	None	None	None
ENSMUSG00000035228	Ccdc106	Ccdc106	coiled-coil domain containing 106 [Source:MGI Symbol;Acc:MGI:2385900]	ARRAYEXPRESS,ENSG
ENSMUSG00000110622	Iqcn	Iqcn	IQ motif containing N [Source:MGI Symbol;Acc:MGI:3708784]	ARRAYEXPRESS,ENSG
ENSMUSG00000111059	None	None	None
ENSMUSG00000112348	None	None	None
ENSMUSG00000113550	Gm29687	Gm29687	predicted gene, 29687 [Source:MGI Symbol;Acc:MGI:5588846]	ARRAYEXPRESS,ENSG
ENSMUSG00000116840	None	None	None
