# Supplementary material for: Xist RNA binds select autosomal genes and depends on Repeat B to regulate their expression
Source: eLife. 2025 Jun 9;13:RP101197. doi: 10.7554/eLife.101197 (PMC12148325; doi:10.7554/eLife.101197)
Supplement: Supplementary file 7. [file elife-101197-supp7.xlsx]

## Sheet: Sheet1
chr start end
chr1 9748207 9748467
chr1 16519129 16519411
chr1 24099978 24100201
chr1 24612629 24613256
chr1 182124673 182125291
chr10 7773792 7774209
chr10 7774551 7775156
chr10 34282057 34283071
chr10 79906825 79907263
chr10 79907426 79907833
chr10 79908259 79908491
chr10 82859220 82859622
chr10 128910523 128910730
chr11 6475248 6476147
chr11 54438155 54438514
chr11 58008750 58008934
chr11 87987353 87987532
chr12 55492014 55492299
chr12 112976415 112976594
chr13 48543896 48545872
chr13 48543896 48545872
chr13 51100732 51100998
chr13 55444707 55444937
chr15 75086672 75086925
chr15 82211572 82212055
chr15 88862525 88863756
chr15 99735676 99736014
chr16 35022252 35023243
chr17 10319001 10319306
chr17 15705579 15705807
chr17 33760022 33760299
chr17 34841548 34841727
chr17 34842007 34842524
chr17 35247992 35248223
chr17 74395855 74396127
chr19 4809984 4811014
chr19 5842737 5843485
chr19 45749022 45749630
chr19 45749022 45749630
chr19 57642874 57643498
chr19 57642874 57643498
chr2 30238058 30238274
chr2 60124759 60125731
chr2 98662555 98662740
chr2 98665018 98665230
chr2 98666527 98667344
chr2 125624622 125625106
chr2 167661347 167661671
chr2 181365519 181365941
chr3 27709752 27710525
chr3 90051884 90052721
chr3 107332499 107333176
chr3 122293683 122293897
chr4 6453734 6453937
chr4 12034044 12034329
chr4 12035195 12035534
chr4 12035723 12037583
chr4 126202489 126202839
chr5 25499270 25499531
chr5 100489684 100490063
chr5 100490609 100492294
chr5 100490609 100492294
chr5 100493226 100493703
chr5 100493924 100494393
chr5 100494678 100495162
chr5 100495325 100496300
chr5 117356727 117356907
chr5 122502095 122502277
chr5 135168347 135171194
chr6 4600953 4601319
chr6 34680830 34681386
chr6 103649106 103649318
chr7 19920648 19921904
chr7 66079529 66079762
chr7 66079943 66080122
chr7 116443724 116443903
chr8 70506450 70506629
chr8 70698862 70699240
chr8 70699393 70699642
chr8 83715621 83716622
chr8 83717730 83717918
chr8 86884998 86885250
chr9 3000430 3000651
chr9 3024385 3024603
chr9 15715418 15719170
chr9 15719405 15719674
chr9 15719879 15720330
chr9 20645123 20645351
chr9 32355401 32355606
chr9 35305365 35305575
chr9 44604579 44605612
chr9 53667164 53667363
chr9 65826407 65827313
chr9 65826407 65827313
