# Supplementary material for: Xist RNA binds select autosomal genes and depends on Repeat B to regulate their expression
Source: eLife. 2025 Jun 9;13:RP101197. doi: 10.7554/eLife.101197 (PMC12148325; doi:10.7554/eLife.101197)
Supplement: Supplementary file 8. [file elife-101197-supp8.xlsx]

## Sheet: Sheet1
chr start end
chr1 182124756 182125265
chr10 34282131 34282736
chr10 80160130 80160458
chr13 48545324 48545820
chr15 88862954 88863461
chr16 35022376 35022878
chr2 125624445 125625148
chr3 90052258 90052497
chr4 12036786 12037209
chr5 135168533 135169152
chr5 135169331 135169796
chr5 135170031 135170599
chr9 15716500 15717573
chr9 44604989 44605244
chr9 65826925 65827113
chr9 65909262 65909729
