# Supplementary material for: Xist RNA binds select autosomal genes and depends on Repeat B to regulate their expression
Source: eLife. 2025 Jun 9;13:RP101197. doi: 10.7554/eLife.101197 (PMC12148325; doi:10.7554/eLife.101197)
Supplement: Supplementary file 9. [file elife-101197-supp9.xlsx]

## Sheet: Sheet1
chr start end
chr1 24612644 24613265
chr10 34282194 34282631
chr13 48544758 48545801
chr15 75086652 75086996
chr15 88863121 88863603
chr15 99735734 99736033
chr16 35022327 35023385
chr19 5843032 5843249
chr2 98662245 98662804
chr2 98666486 98667371
chr2 125624477 125625175
chr3 107332208 107333071
chr4 12036856 12037344
chr4 12036856 12037344
chr5 111902880 111903463
chr5 135168583 135169686
chr5 135169976 135170714
chr6 103649133 103649378
chr7 19921302 19921673
chr8 83715354 83716531
chr9 3000406 3000658
chr9 3024048 3024625
chr9 15716702 15718873
chr9 35305301 35305603
