# Supplementary material for: Xist RNA binds select autosomal genes and depends on Repeat B to regulate their expression
Source: eLife. 2025 Jun 9;13:RP101197. doi: 10.7554/eLife.101197 (PMC12148325; doi:10.7554/eLife.101197)
Supplement: Supplementary file 10. [file elife-101197-supp10.xlsx]

## Sheet: Sheet1
initial_alias	converted_alias	name	description	namespace
ENSMUSG00000045210	Vcpip1	Vcpip1	valosin containing protein (p97)/p47 complex interacting protein 1 [Source:MGI Symbol;Acc:MGI:1917925]	ARRAYEXPRESS,ENSG
ENSMUSG00000097893	None	None	None
ENSMUSG00000025920	Stau2	Stau2	staufen double-stranded RNA binding protein 2 [Source:MGI Symbol;Acc:MGI:1352508]	ARRAYEXPRESS,ENSG
ENSMUSG00000026153	Fam135a	Fam135a	family with sequence similarity 135, member A [Source:MGI Symbol;Acc:MGI:1915437]	ARRAYEXPRESS,ENSG
ENSMUSG00000102398	None	None	None
ENSMUSG00000100747	None	None	None
ENSMUSG00000007476	Lrrc8a	Lrrc8a	leucine rich repeat containing 8A VRAC subunit A [Source:MGI Symbol;Acc:MGI:2652847]	ARRAYEXPRESS,ENSG
ENSMUSG00000099041	None	None	None
ENSMUSG00000026987	Baz2b	Baz2b	bromodomain adjacent to zinc finger domain, 2B [Source:MGI Symbol;Acc:MGI:2442782]	ARRAYEXPRESS,ENSG
ENSMUSG00000086603	None	None	None
ENSMUSG00000082330	None	None	None
ENSMUSG00000089739	None	None	None
ENSMUSG00000090213	Peds1	Peds1	plasmanylethanolamine desaturase 1 [Source:MGI Symbol;Acc:MGI:2142624]	ARRAYEXPRESS,ENSG
ENSMUSG00000085914	None	None	None
ENSMUSG00000038685	Rtel1	Rtel1	regulator of telomere elongation helicase 1 [Source:MGI Symbol;Acc:MGI:2139369]	ARRAYEXPRESS,ENSG
ENSMUSG00000038671	Arfrp1	Arfrp1	ADP-ribosylation factor related protein 1 [Source:MGI Symbol;Acc:MGI:1923938]	ARRAYEXPRESS,ENSG
ENSMUSG00000027582	Zgpat	Zgpat	zinc finger, CCCH-type with G patch domain [Source:MGI Symbol;Acc:MGI:2449939]	ARRAYEXPRESS,ENSG
ENSMUSG00000039286	Fndc3b	Fndc3b	fibronectin type III domain containing 3B [Source:MGI Symbol;Acc:MGI:1919257]	ARRAYEXPRESS,ENSG
ENSMUSG00000057359	None	None	None
ENSMUSG00000039756	Dnttip2	Dnttip2	deoxynucleotidyltransferase, terminal, interacting protein 2 [Source:MGI Symbol;Acc:MGI:1923173]	ARRAYEXPRESS,ENSG
ENSMUSG00000105057	None	None	None
ENSMUSG00000076456	Mir760	Mir760	microRNA 760 [Source:MGI Symbol;Acc:MGI:3691613]	ARRAYEXPRESS,ENSG
ENSMUSG00000028121	Bcar3	Bcar3	breast cancer anti-estrogen resistance 3 [Source:MGI Symbol;Acc:MGI:1352501]	ARRAYEXPRESS,ENSG
ENSMUSG00000028245	Nsmaf	Nsmaf	neutral sphingomyelinase (N-SMase) activation associated factor [Source:MGI Symbol;Acc:MGI:1341864]	ARRAYEXPRESS,ENSG
ENSMUSG00000085467	None	None	None
ENSMUSG00000049488	Tmem67	Tmem67	transmembrane protein 67 [Source:MGI Symbol;Acc:MGI:1923928]	ARRAYEXPRESS,ENSG
ENSMUSG00000043962	Thrap3	Thrap3	thyroid hormone receptor associated protein 3 [Source:MGI Symbol;Acc:MGI:2442637]	ARRAYEXPRESS,ENSG
ENSMUSG00000084504	Gm25323	Gm25323	predicted gene, 25323 [Source:MGI Symbol;Acc:MGI:5455100]	ARRAYEXPRESS,ENSG
ENSMUSG00000038056	Kmt2c	Kmt2c	lysine (K)-specific methyltransferase 2C [Source:MGI Symbol;Acc:MGI:2444959]	ARRAYEXPRESS,ENSG
ENSMUSG00000066894	Vsig10	Vsig10	V-set and immunoglobulin domain containing 10 [Source:MGI Symbol;Acc:MGI:2448533]	ARRAYEXPRESS,ENSG
ENSMUSG00000081274	None	None	None
ENSMUSG00000029364	Wsb2	Wsb2	WD repeat and SOCS box-containing 2 [Source:MGI Symbol;Acc:MGI:2144041]	ARRAYEXPRESS,ENSG
ENSMUSG00000029467	Atp2a2	Atp2a2	ATPase, Ca++ transporting, cardiac muscle, slow twitch 2 [Source:MGI Symbol;Acc:MGI:88110]	ARRAYEXPRESS,ENSG
ENSMUSG00000105970	None	None	None
ENSMUSG00000106375	None	None	None
ENSMUSG00000088583	None	None	None
ENSMUSG00000097513	None	None	None
ENSMUSG00000015189	Casd1	Casd1	CAS1 domain containing 1 [Source:MGI Symbol;Acc:MGI:2384865]	ARRAYEXPRESS,ENSG
ENSMUSG00000107932	None	None	None
ENSMUSG00000029761	Cald1	Cald1	caldesmon 1 [Source:MGI Symbol;Acc:MGI:88250]	ARRAYEXPRESS,ENSG
ENSMUSG00000030512	Snrpa1	Snrpa1	small nuclear ribonucleoprotein polypeptide A' [Source:MGI Symbol;Acc:MGI:1916231]	ARRAYEXPRESS,ENSG
ENSMUSG00000108777	None	None	None
ENSMUSG00000075701	Selenos	Selenos	selenoprotein S [Source:MGI Symbol;Acc:MGI:95994]	ARRAYEXPRESS,ENSG
ENSMUSG00000030660	Pik3c2a	Pik3c2a	phosphatidylinositol-4-phosphate 3-kinase catalytic subunit type 2 alpha [Source:MGI Symbol;Acc:MGI:1203729]	ARRAYEXPRESS,ENSG
ENSMUSG00000108461	None	None	None
ENSMUSG00000007888	Crlf1	Crlf1	cytokine receptor-like factor 1 [Source:MGI Symbol;Acc:MGI:1340030]	ARRAYEXPRESS,ENSG
ENSMUSG00000058833	Rex1bd	Rex1bd	required for excision 1-B domain containing [Source:MGI Symbol;Acc:MGI:1913712]	ARRAYEXPRESS,ENSG
ENSMUSG00000090137	Uba52	Uba52	ubiquitin A-52 residue ribosomal protein fusion product 1 [Source:MGI Symbol;Acc:MGI:98887]	ARRAYEXPRESS,ENSG
ENSMUSG00000055553	Kxd1	Kxd1	KxDL motif containing 1 [Source:MGI Symbol;Acc:MGI:1922870]	ARRAYEXPRESS,ENSG
ENSMUSG00000071076	Jund	Jund	jun D proto-oncogene [Source:MGI Symbol;Acc:MGI:96648]	ARRAYEXPRESS,ENSG
ENSMUSG00000080058	None	None	None
ENSMUSG00000110622	Iqcn	Iqcn	IQ motif containing N [Source:MGI Symbol;Acc:MGI:3708784]	ARRAYEXPRESS,ENSG
ENSMUSG00000005481	Ddx39a	Ddx39a	DEAD box helicase 39a [Source:MGI Symbol;Acc:MGI:1915528]	ARRAYEXPRESS,ENSG
ENSMUSG00000002885	Adgre5	Adgre5	adhesion G protein-coupled receptor E5 [Source:MGI Symbol;Acc:MGI:1347095]	ARRAYEXPRESS,ENSG
ENSMUSG00000098465	Mir1668	Mir1668	microRNA 1668 [Source:MGI Symbol;Acc:MGI:5530972]	ARRAYEXPRESS,ENSG
ENSMUSG00000031652	N4bp1	N4bp1	NEDD4 binding protein 1 [Source:MGI Symbol;Acc:MGI:2136825]	ARRAYEXPRESS,ENSG
ENSMUSG00000098434	None	None	None
ENSMUSG00000043885	Slc36a4	Slc36a4	solute carrier family 36 (proton/amino acid symporter), member 4 [Source:MGI Symbol;Acc:MGI:2442595]	ARRAYEXPRESS,ENSG
ENSMUSG00000066892	Fbxl12	Fbxl12	F-box and leucine-rich repeat protein 12 [Source:MGI Symbol;Acc:MGI:1354738]	ARRAYEXPRESS,ENSG
ENSMUSG00000084786	Ubl5	Ubl5	ubiquitin-like 5 [Source:MGI Symbol;Acc:MGI:1913427]	ARRAYEXPRESS,ENSG
ENSMUSG00000032171	Pin1	Pin1	peptidyl-prolyl cis/trans isomerase, NIMA-interacting 1 [Source:MGI Symbol;Acc:MGI:1346036]	ARRAYEXPRESS,ENSG
ENSMUSG00000111056	None	None	None
ENSMUSG00000032030	Cul5	Cul5	cullin 5 [Source:MGI Symbol;Acc:MGI:1922967]	ARRAYEXPRESS,ENSG
ENSMUSG00000086914	Gm16124	Gm16124	predicted gene 16124 [Source:MGI Symbol;Acc:MGI:3802001]	ARRAYEXPRESS,ENSG
ENSMUSG00000040006	Ginm1	Ginm1	glycoprotein integral membrane 1 [Source:MGI Symbol;Acc:MGI:2384905]	ARRAYEXPRESS,ENSG
ENSMUSG00000085211	None	None	None
ENSMUSG00000013833	Med16	Med16	mediator complex subunit 16 [Source:MGI Symbol;Acc:MGI:2158394]	ARRAYEXPRESS,ENSG
ENSMUSG00000035781	R3hdm4	R3hdm4	R3H domain containing 4 [Source:MGI Symbol;Acc:MGI:1924814]	ARRAYEXPRESS,ENSG
ENSMUSG00000035773	Kiss1r	Kiss1r	KISS1 receptor [Source:MGI Symbol;Acc:MGI:2148793]	ARRAYEXPRESS,ENSG
ENSMUSG00000020250	Txnrd1	Txnrd1	thioredoxin reductase 1 [Source:MGI Symbol;Acc:MGI:1354175]	ARRAYEXPRESS,ENSG
ENSMUSG00000112375	None	None	None
ENSMUSG00000112889	None	None	None
ENSMUSG00000109864	Eid3	Eid3	EP300 interacting inhibitor of differentiation 3 [Source:MGI Symbol;Acc:MGI:1913591]	ARRAYEXPRESS,ENSG
ENSMUSG00000025351	Cd63	Cd63	CD63 antigen [Source:MGI Symbol;Acc:MGI:99529]	ARRAYEXPRESS,ENSG
ENSMUSG00000025350	Rdh5	Rdh5	retinol dehydrogenase 5 [Source:MGI Symbol;Acc:MGI:1201412]	ARRAYEXPRESS,ENSG
ENSMUSG00000090247	Bloc1s1	Bloc1s1	biogenesis of lysosomal organelles complex-1, subunit 1 [Source:MGI Symbol;Acc:MGI:1195276]	ARRAYEXPRESS,ENSG
ENSMUSG00000094483	Purb	Purb	purine rich element binding protein B [Source:MGI Symbol;Acc:MGI:1338779]	ARRAYEXPRESS,ENSG
ENSMUSG00000092885	None	None	None
ENSMUSG00000086839	None	None	None
ENSMUSG00000035992	Fnip1	Fnip1	folliculin interacting protein 1 [Source:MGI Symbol;Acc:MGI:2444668]	ARRAYEXPRESS,ENSG
ENSMUSG00000037331	Larp1	Larp1	La ribonucleoprotein 1, translational regulator [Source:MGI Symbol;Acc:MGI:1890165]	ARRAYEXPRESS,ENSG
ENSMUSG00000020483	Dynll2	Dynll2	dynein light chain LC8-type 2 [Source:MGI Symbol;Acc:MGI:1915347]	ARRAYEXPRESS,ENSG
ENSMUSG00000021025	Nfkbia	Nfkbia	nuclear factor of kappa light polypeptide gene enhancer in B cells inhibitor, alpha [Source:MGI Symbol;Acc:MGI:104741]	ARRAYEXPRESS,ENSG
ENSMUSG00000112348	None	None	None
ENSMUSG00000011158	Brf1	Brf1	BRF1, RNA polymerase III transcription initiation factor 90 kDa subunit [Source:MGI Symbol;Acc:MGI:1919558]	ARRAYEXPRESS,ENSG
ENSMUSG00000113519	None	None	None
ENSMUSG00000002803	Btbd6	Btbd6	BTB (POZ) domain containing 6 [Source:MGI Symbol;Acc:MGI:3026623]	ARRAYEXPRESS,ENSG
ENSMUSG00000021395	Spin1	Spin1	spindlin 1 [Source:MGI Symbol;Acc:MGI:109242]	ARRAYEXPRESS,ENSG
ENSMUSG00000074886	Grk6	Grk6	G protein-coupled receptor kinase 6 [Source:MGI Symbol;Acc:MGI:1347078]	ARRAYEXPRESS,ENSG
ENSMUSG00000099058	Mir6943	Mir6943	microRNA 6943 [Source:MGI Symbol;Acc:MGI:5531173]	ARRAYEXPRESS,ENSG
ENSMUSG00000022463	Srebf2	Srebf2	sterol regulatory element binding factor 2 [Source:MGI Symbol;Acc:MGI:107585]	ARRAYEXPRESS,ENSG
ENSMUSG00000096883	Shisa8	Shisa8	shisa family member 8 [Source:MGI Symbol;Acc:MGI:2146080]	ARRAYEXPRESS,ENSG
ENSMUSG00000068105	Tnfrsf13c	Tnfrsf13c	tumor necrosis factor receptor superfamily, member 13c [Source:MGI Symbol;Acc:MGI:1919299]	ARRAYEXPRESS,ENSG
ENSMUSG00000062078	Qki	Qki	quaking, KH domain containing RNA binding [Source:MGI Symbol;Acc:MGI:97837]	ARRAYEXPRESS,ENSG
ENSMUSG00000099384	1700110C19Rik	1700110C19Rik	RIKEN cDNA 1700110C19 gene [Source:MGI Symbol;Acc:MGI:1923884]	ARRAYEXPRESS,ENSG
ENSMUSG00000023852	Chd1	Chd1	chromodomain helicase DNA binding protein 1 [Source:MGI Symbol;Acc:MGI:88393]	ARRAYEXPRESS,ENSG
ENSMUSG00000077450	Rab11b	Rab11b	RAB11B, member RAS oncogene family [Source:MGI Symbol;Acc:MGI:99425]	ARRAYEXPRESS,ENSG
ENSMUSG00000090952	None	None	None
ENSMUSG00000061207	Stk19	Stk19	serine/threonine kinase 19 [Source:MGI Symbol;Acc:MGI:1860085]	ARRAYEXPRESS,ENSG
ENSMUSG00000040482	Dxo	Dxo	decapping exoribonuclease [Source:MGI Symbol;Acc:MGI:1890444]	ARRAYEXPRESS,ENSG
ENSMUSG00000040356	Skic2	Skic2	SKI2 subunit of superkiller complex [Source:MGI Symbol;Acc:MGI:1099835]	ARRAYEXPRESS,ENSG
ENSMUSG00000098458	Mir6971	Mir6971	microRNA 6971 [Source:MGI Symbol;Acc:MGI:5530689]	ARRAYEXPRESS,ENSG
ENSMUSG00000024369	Nelfe	Nelfe	negative elongation factor complex member E, Rdbp [Source:MGI Symbol;Acc:MGI:102744]	ARRAYEXPRESS,ENSG
ENSMUSG00000024403	Atp6v1g2	Atp6v1g2	ATPase, H+ transporting, lysosomal V1 subunit G2 [Source:MGI Symbol;Acc:MGI:1913487]	ARRAYEXPRESS,ENSG
ENSMUSG00000019432	Ddx39b	Ddx39b	DEAD box helicase 39b [Source:MGI Symbol;Acc:MGI:99240]	ARRAYEXPRESS,ENSG
ENSMUSG00000075770	Gm22589	Gm22589	predicted gene, 22589 [Source:MGI Symbol;Acc:MGI:5452366]	ARRAYEXPRESS,ENSG
ENSMUSG00000098499	Mir6975	Mir6975	microRNA 6975 [Source:MGI Symbol;Acc:MGI:5531075]	ARRAYEXPRESS,ENSG
ENSMUSG00000065273	Gm25128	Gm25128	predicted gene, 25128 [Source:MGI Symbol;Acc:MGI:5454905]	ARRAYEXPRESS,ENSG
ENSMUSG00000098269	Mir8094	Mir8094	microRNA 8094 [Source:MGI Symbol;Acc:MGI:5530895]	ARRAYEXPRESS,ENSG
ENSMUSG00000024068	Spast	Spast	spastin [Source:MGI Symbol;Acc:MGI:1858896]	ARRAYEXPRESS,ENSG
ENSMUSG00000024069	Slc30a6	Slc30a6	solute carrier family 30 (zinc transporter), member 6 [Source:MGI Symbol;Acc:MGI:2386741]	ARRAYEXPRESS,ENSG
ENSMUSG00000096370	Gm21992	Gm21992	predicted gene 21992 [Source:MGI Symbol;Acc:MGI:5439461]	ARRAYEXPRESS,ENSG
ENSMUSG00000095913	None	None	None
ENSMUSG00000006456	Rbm14	Rbm14	RNA binding motif protein 14 [Source:MGI Symbol;Acc:MGI:1929092]	ARRAYEXPRESS,ENSG
ENSMUSG00000025219	Fgf8	Fgf8	fibroblast growth factor 8 [Source:MGI Symbol;Acc:MGI:99604]	ARRAYEXPRESS,ENSG
ENSMUSG00000056209	Npm3	Npm3	nucleoplasmin 3 [Source:MGI Symbol;Acc:MGI:894653]	ARRAYEXPRESS,ENSG
ENSMUSG00000087367	None	None	None
ENSMUSG00000025220	Oga	Oga	O-GlcNAcase [Source:MGI Symbol;Acc:MGI:1932139]	ARRAYEXPRESS,ENSG
ENSMUSG00000054843	Atrnl1	Atrnl1	attractin like 1 [Source:MGI Symbol;Acc:MGI:2147749]	ARRAYEXPRESS,ENSG
