# Supplementary material for: Xist RNA binds select autosomal genes and depends on Repeat B to regulate their expression
Source: eLife. 2025 Jun 9;13:RP101197. doi: 10.7554/eLife.101197 (PMC12148325; doi:10.7554/eLife.101197)
Supplement: Supplementary file 11. [file elife-101197-supp11.xlsx]

## Sheet: Sheet1
Figure	Group 1	Group 2	Average change	p value
1E	d4_Xist	d4_Sense	-0.7987	<0.0001
1E	d4_Xist	d4_Inp	-1.223	<0.0001
1E	d7_Xist	d7_Sense	-0.5798	<0.0001
1E	d7_Xist	d7_Inp	-1.153	<0.0001
1E	d14_Xist	d14_Sense	-0.6244	<0.0001
1E	d14_Xist	d14_Inp	-1.175	<0.0001
2E	d4_WT♀	d4_△B♀	-26.53	<0.0001
2E	d7_WT♀	d7_△B♀	-54.21	<0.0001
2E	d14_WT♀	d14_△B♀	-5.816	0.063
3B	d4_10k	d4_20k	-0.2372	0.6766
3B	d4_10k	d4_50k	-0.9993	0.0042
3B	d4_10k	d4_100k	-1.05	0.0005
3D	d4_WT♀	d4_△B♀	0.1041	****
3D	d7_WT♀	d7_△B♀	0.1614	****
3D	d14_WT♀	d14_△B♀	0.1229	****
3G	d4_WT♀	d4_△B♀	0.08129	0.1328
3G	d4_WT♀	d4_WT♂	0.1957	****
3G	d7_WT♀	d7_△B♀	0.05433	0.0059
3G	d7_WT♀	d7_WT♂	0.1131	****
3G	d14_WT♀	d14_△B♀	0.006897	0.8996
3G	d14_WT♀	d14_WT♂	0.04774	0.4223
4B	ctrl	TG	-0.02	****
4D	ctrl	TG	-0.01606	0.037
4F	ctrl	TG	-0.002644	0.9701
5E	DMSO	X1	0.08538	0.0023
5F	DMSO	X1	0.01472	0.1536
7D	MEF_WT	MEF_△B	-0.07838	0.0882
7D	MEF_WT	MEF_△E	-0.08202	0.1134
7E	MEF_WT	MEF_△B	-0.007624	0.9638
7E	MEF_WT	MEF_△E	-0.01376	0.1448
7F	Male	Female	-0.006533	0.5124
7G	Male	Female	0.01642	0.2060
S3A	Xist_XCI_Active♀	△B_XCI_Acitive♀	-0.8018	****
S3A	Xist_XCI_Active♀	Xist_XCI_Active♂	-2.884	****
S3A	Xist_XCI_Active♀	Sense_XCI_Active♀	-1.382	****
S3A	Xist_XCI_Active♀	Xist_XCI_Inactive♀	-0.9177	****
S3A	Xist_XCI_Active♀	Xist_escapee♀	1.617	0.020
S5C	WT♀	△B♀	0.01574	0.2260
S5C	WT♀	WT♂	0.1769	****
S6A	10k	20k	-0.3875	0.2583
S6A	10k	50k	-0.8056	0.0023
S6A	10k	100k	-1.327	<0.0001
S6B	10k	20k	-0.4982	0.2602
S6B	10k	50k	-0.8054	0.0449
S6B	10k	100k	-0.9735	0.0083
S8A	10k	20k	0	0.8531
S8A	10k	50k	0.03664	0.4614
S8A	10k	100k	0.2450	0.2317
S8B	10k	20k	0.02072	0.8184
S8B	10k	50k	-0.02072	0.7592
S8B	10k	100k	0.1052	0.4530
S8C	10k	20k	-0.116	0.9456
S8C	10k	50k	-0.1326	0.8904
S8C	10k	100k	0.116	0.619
S8E	d4_WT♀	d4_△B♀	<0.0001	0.5503
S8E	d4_WT♀	d4_WT♂	<0.0001	0.4316
S8E	d7_WT♀	d7_△B♀	-0.05075	0.0566
S8E	d7_WT♀	d7_WT♂	-0.001267	0.9369
S8E	d14_WT♀	d14_△B♀	-0.001493	0.2235
S8E	d14_WT♀	d14_WT♂	0.02224	0.0641
